# Supplementary material for: Genotype-driven variations in lncRNA expression underlie predisposition to high-grade serous ovarian cancer
Source: Research Square preprint supplement (doi:10.21203/rs.3.rs-6929868/v1), 2025-06-24
Supplement: Supplementary file 1 [file 86ed1c874d9081ed1ca7d36a.pdf]

### Supplementary figure 1

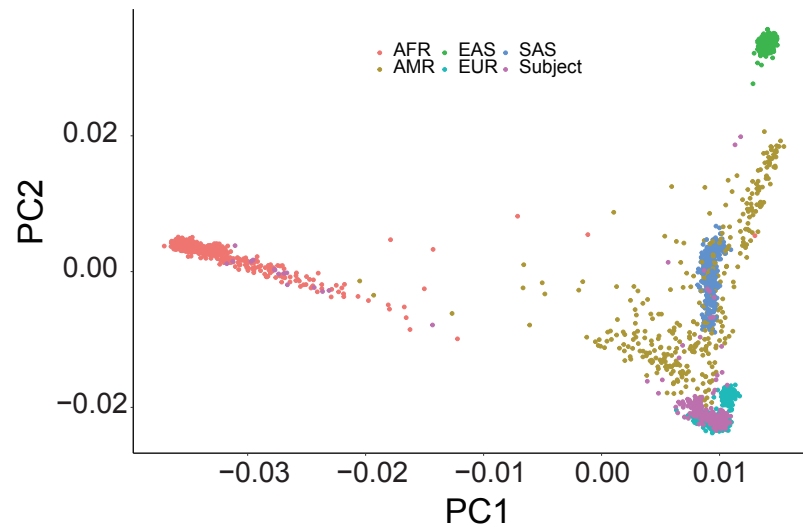

**Figure S1. Genotype data distribution.** Principal component analysis of genotype data from 348 HGSOC subjects compared with reference genome data from the 1,000 Genomes Project Phase 3.

### Supplementary figure 2

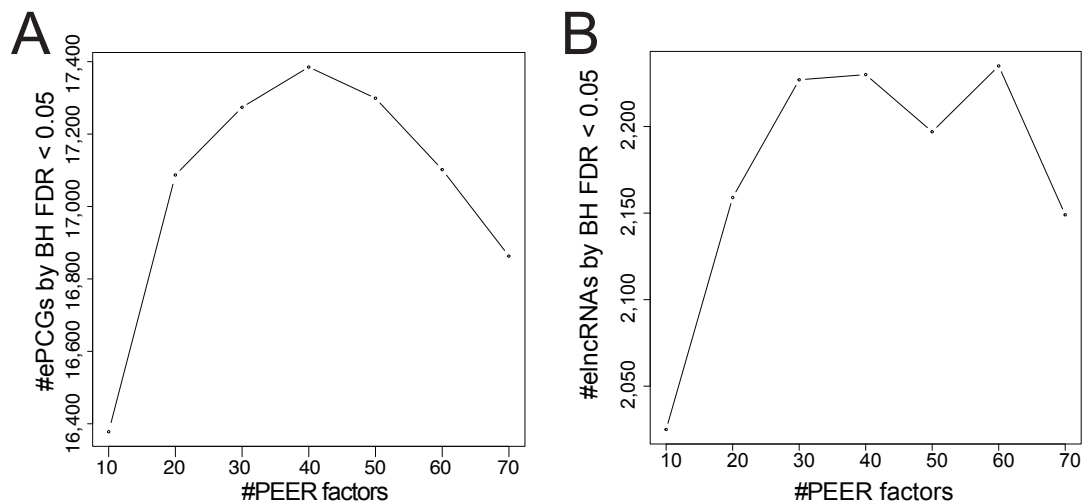

**Figure S2. Optimization of PEER factors.** The number of significant PCG-eQTLs (ePCGs, A) and lncRNA-eQTLs (elncRNAs, B) varies with the number of included PEER factors. The ePCGs and elncRNAs were identified using a Benjamin-Hochberg FDR threshold of < 0.05 for PEER factor optimization.

### Supplementary figure 3

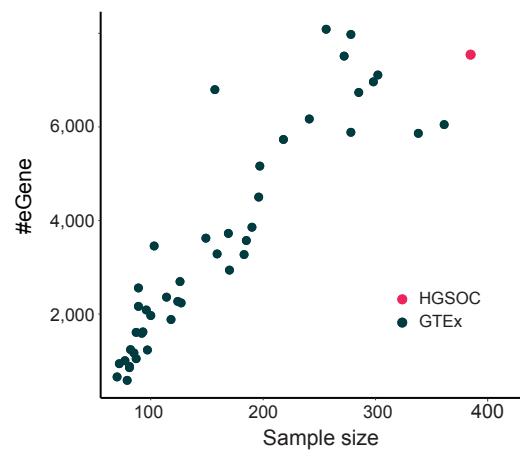

**Figure S3. The number of identified eGenes in HGSOC samples.** Relationship between sample size (x-axis) and the number of identified eGenes (y-axis). Red dot represents the number of identified eGenes in HGSOC samples; Black dots show the number of identified eGenes in 44 human tissues from GTEx (v7).

### Supplementary figure 4

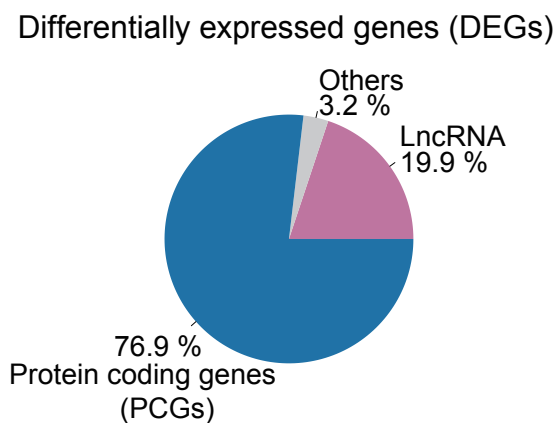

**Figure S4. Composition of differentially expressed genes (DEGs).** Of the DEGs, 76.9% were protein-coding genes (PCGs), and 19.9% were lncRNAs.

### Supplementary figure 5

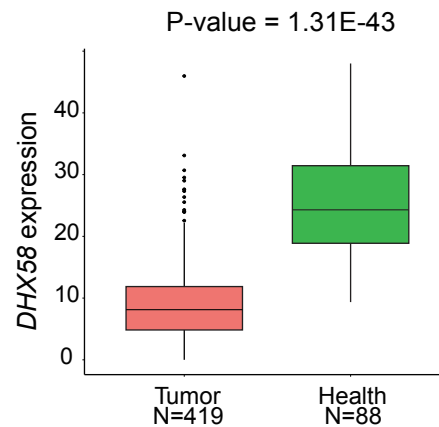

**Figure S5. An example of differentially expressed gene, *DHX58*, between HGSOC tumor samples (N=419) and healthy samples (N=88).** Two-sided P-value = 1.31E-43. Center lines show the medians; box limits indicate the 25<sup>th</sup> and 75<sup>th</sup> percentiles; whiskers extend to the 5<sup>th</sup> and 95<sup>th</sup> percentiles; outliers are represented by dots.

### Supplementary figure 6

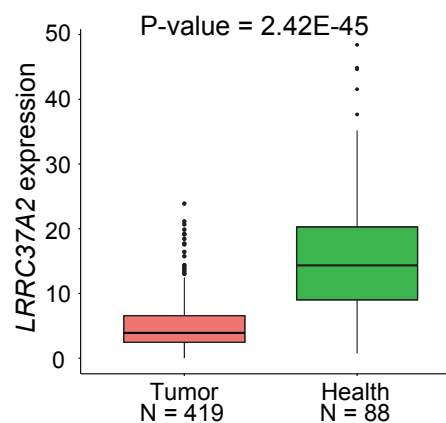

**Figure S6. An example of differentially expressed gene (DEG), *LRRC37A2*, between HGSOC tumor samples (N=419) and healthy samples (N=88).** Two-sided P-value = 2.42E-45. Center lines show the medians; box limits indicate the 25<sup>th</sup> and 75<sup>th</sup> percentiles; whiskers extend to the 5<sup>th</sup> and 95<sup>th</sup> percentiles; outliers are represented by dots.

## Supplementary figure 7

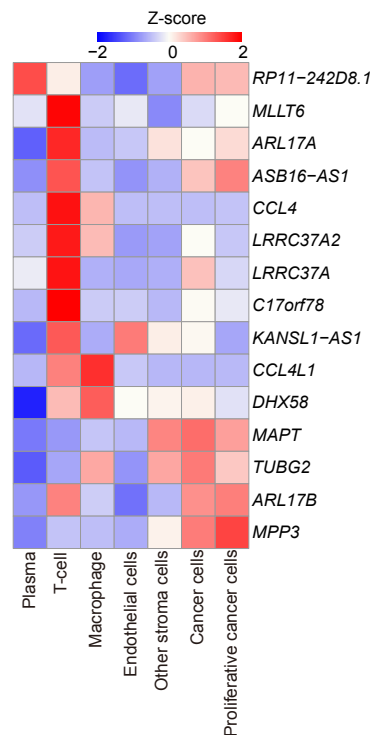

**Figure S7. The single-cell expression patterns of candidate susceptibility genes on chromosome 17 identified by overlapping HGSOC GWAS with tumor eQTLs.** Mean expression values for each gene were calculated in each cluster. The color scheme represents Z-score, derived from normalized gene expression levels, indicating relative expression levels compared to other cell types.

Supplementary figure 8

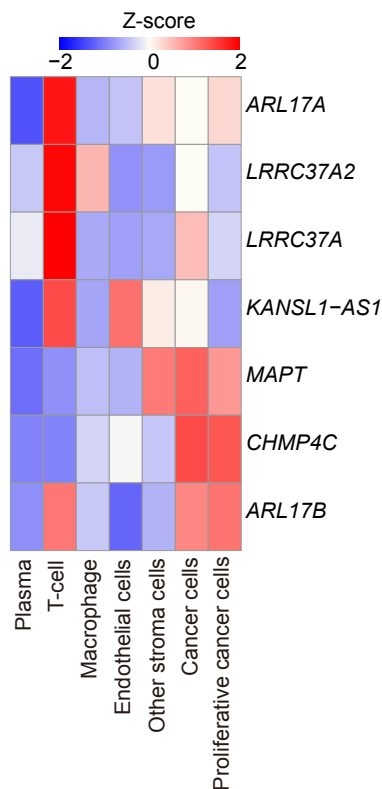

**Figure S8. Expression of 7 colocalized genes in human HGSOC tumors.**

Mean expression value for each gene was calculated within each cluster. The color scheme represents Z-score, derived from normalized gene expression levels, indicating relative expression levels compared to other cell types.

## Supplementary figure 9

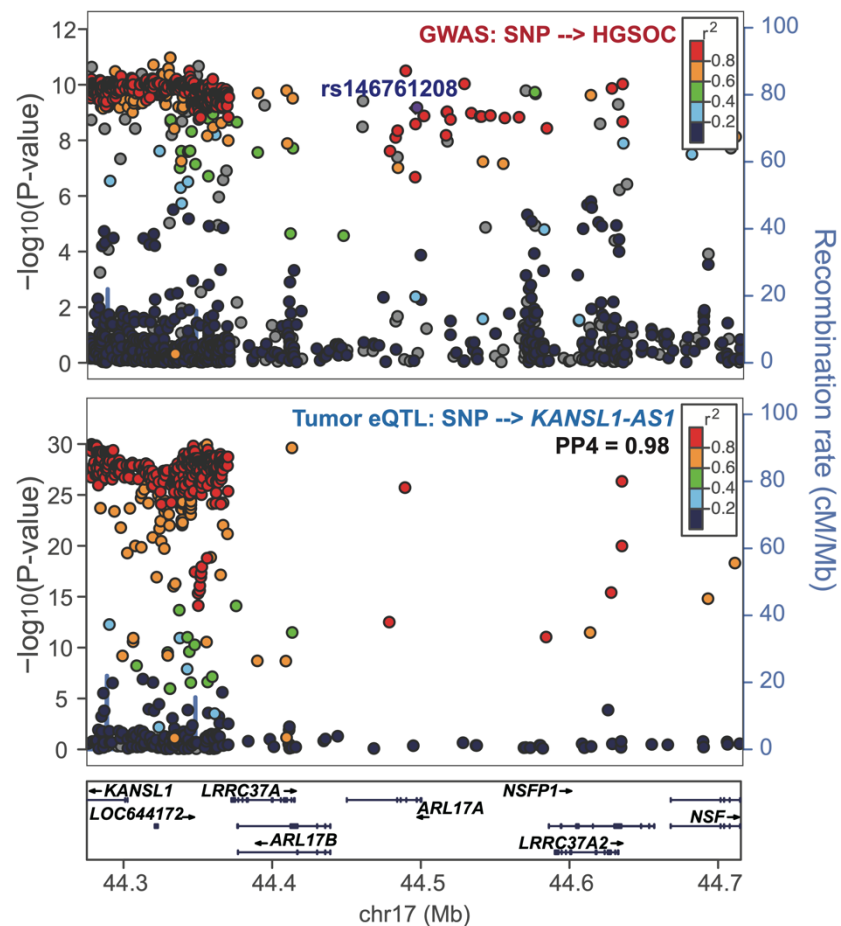

**Figure S9. LocusZoom plots for HGSOC GWAS variants and HGSOC tumor lncRNA-eQTLs on *KANSL1-AS1*.** The x-axis displays the  $\pm 200$  kb genomic region around rs146761208. The y-axis represents GWAS significance  $-\log_{10}(\text{two-sided P-value})$ . Each data point represents a variant, with color indicating the  $r^2$  (degree of linkage disequilibrium). N = 53,978 individuals for HGSOC GWAS; N = 348 individuals for HGSOC tumor lncRNA-eQTLs.

## Supplementary figure 10

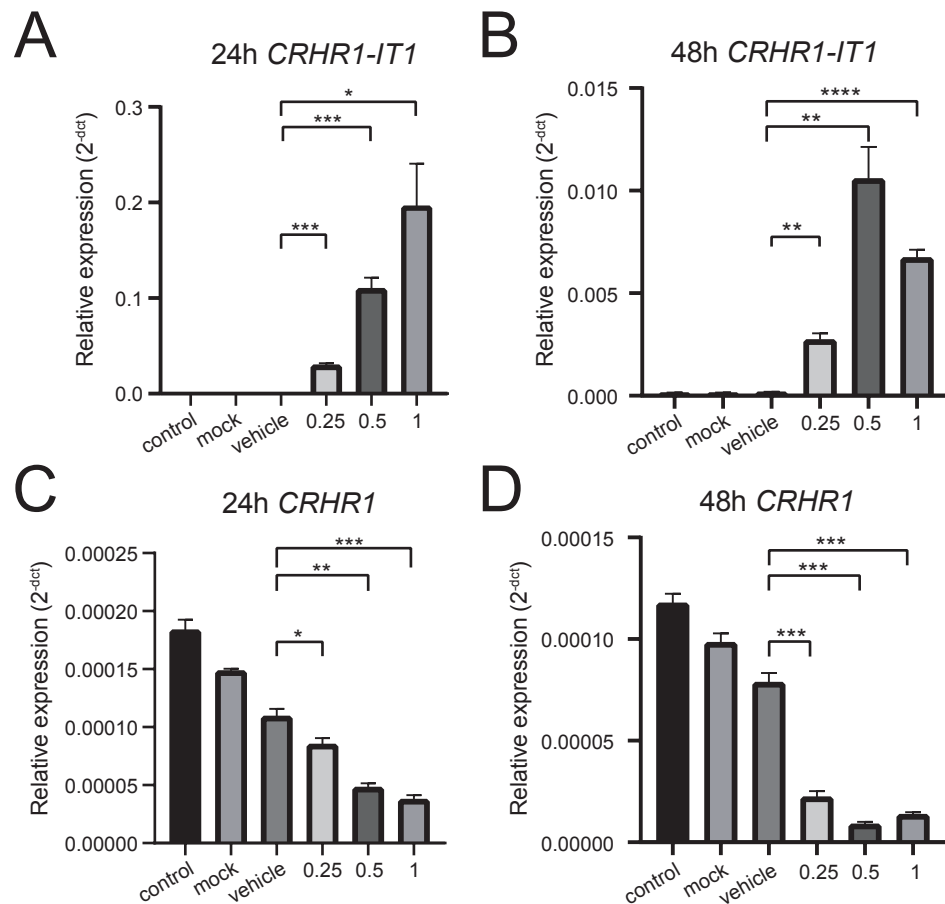

**Figure S10. Expression of *CRHR1-IT1* and *CRHR1* in OVCAR-3 cells at 24 and 48 hours after transfection.** (A) *CRHR1-IT1* (24 hours), (B) *CRHR1-IT1* (48 hours), (C) *CRHR1* (24 hours), and (D) *CRHR1* (48 hours). Transfection conditions include: control (0 µg/well vector, null condition), mock (0 µg/well vector, baseline transfection reagents), vehicle (1 µg/well pcDNA3.1 (+) vector), and increasing concentrations of pcDNA3.1(+)-*CRHR1-IT1* vector: 0.25 µg/well, 0.5 µg/well, and 1 µg/well. Results are presented as mean  $\pm$  SE of three technical replicates per group. Significance levels are indicated as \* $p < 0.05$ , \*\* $p < 0.01$ , \*\*\* $p < 0.001$  and \*\*\*\* $p < 0.0001$ , determined by unpaired t-test.

## Supplementary figure 11

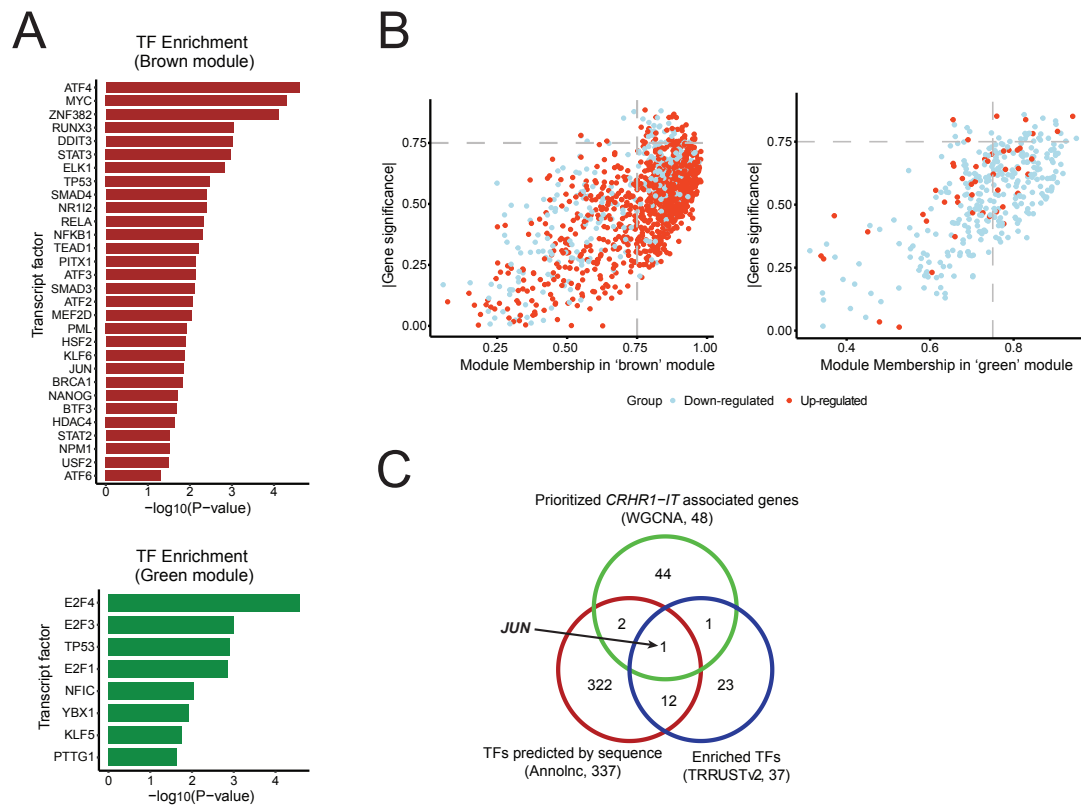

**Figure S11. Co-expression network analysis highlights the role of *JUN* following *CRHR1-IT1* transfection.** (A) Transcription factor enrichment analysis of genes in the 'green' and 'brown' modules. (B) Scatter plot showing Module Membership (MM, x-axis) and the absolute value of Gene Significance (GS, y-axis) for genes in the 'green' and 'brown' modules. Key genes are those with |GS| in the top 25% and MM > 0.9. (C) Venn diagram comparing sequence-based predictions (by AnnoLnc), enriched TFs (TRRUST v2), and prioritized *CRHR1-IT* expression correlated hub genes in the 'green' and 'brown' modules. *JUN* is the only gene that satisfies all three criteria.



## Supplementary figure 12

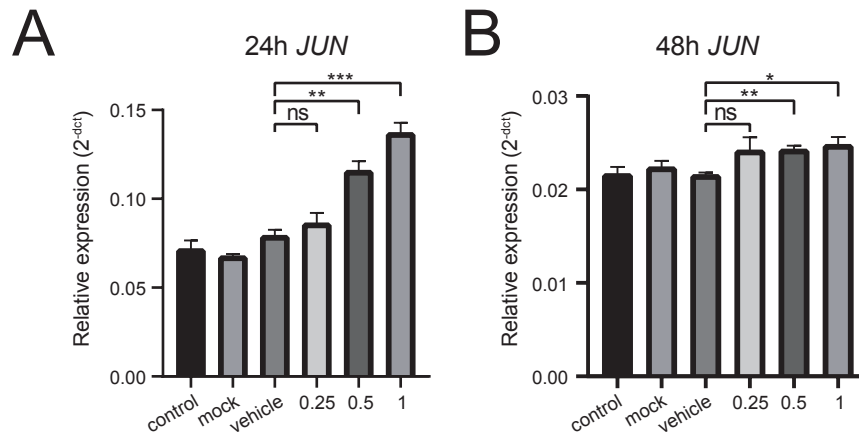

**Figure S12. *JUN* expression in OVCAR-3 cells at 24 and 48 hours after transfection.** (A) *JUN* (24 hours), (B) *JUN* (48 hours). Transfection conditions include: control (0 µg/well vector, null condition), mock (0 µg/well vector, with baseline transfection reagents), vehicle (1 µg/well pcDNA3.1 (+) vector), and increasing concentrations of pcDNA3.1(+)-*CRHR1-IT1* vector: 0.25 µg/well, 0.5 µg/well, and 1 µg/well. Results are shown as mean ± SE of three technical replicates per group. Significance levels are indicated as \*p < 0.05, \*\*p < 0.01, \*\*\*p < 0.001 and \*\*\*\*p < 0.0001, determined by unpaired t-test.

### Supplementary figure 13

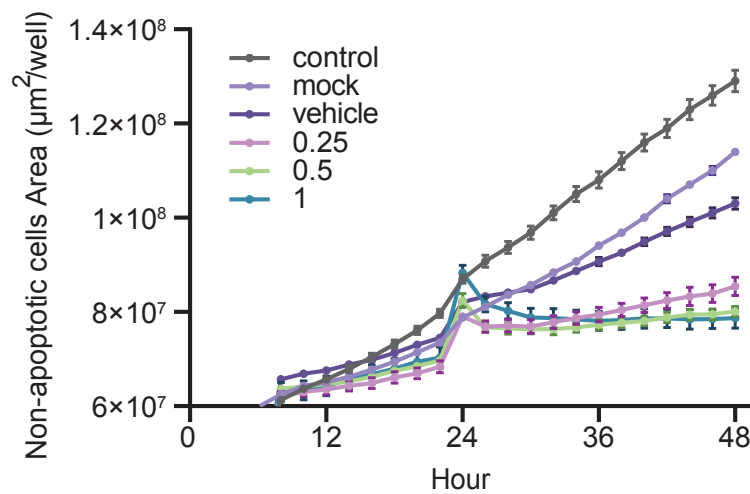

**Figure S13. Real-time growth monitoring of non-apoptosis cells using the Incucyte live imaging and analysis system, starting at 6h after transfection.** OVCAR-3 cells were transfected with: control (0  $\mu\text{g}/\text{well}$  vector, null condition), mock (0  $\mu\text{g}/\text{well}$  vector, baseline transfection reagents), vehicle (1  $\mu\text{g}/\text{well}$  pcDNA3.1 (+) vector), and increasing concentrations of pcDNA3.1(+)-*CRHR1-IT1* vector: 0.25  $\mu\text{g}/\text{well}$ , 0.5  $\mu\text{g}/\text{well}$ , and 1  $\mu\text{g}/\text{well}$ . The x-axis represents hours after transfection. The y-axis is the area of non-apoptotic cells ( $\mu\text{m}^2/\text{well}$ ).
