# Supplementary material for: Genotype-driven variations in lncRNA expression underlie predisposition to high-grade serous ovarian cancer
Source: Research Square preprint supplement (doi:10.21203/rs.3.rs-6929868/v1), 2025-06-24
Supplement: Supplementary file 1 [file 991178e27158e290878cd8a9.xlsx]

## Sheet: Menu
Table S1	Quality control of genotype data
Table S2	Demographic and clinical characteristics of the HGSOC participants
Table S3	Sequencing information for human HGSOC snRandom-seq samples
Table S4	Sequence of lncRNA CRHR1-IT1
Table S5	Primer sequences for qRT-PCR
Table S6	The lncRNA-eQTL analysis identified 572 elncRNAs
Table S7	Differentially expressed genes (404 PCGs and 94 lncRNAs) potentially driven by underlying germline variants
Table S8	Candidate susceptibility genes reported in breast cancer studies
Table S9	Colocalization of HGSOC GWAS leading SNPs with PCG-eQTLs and lnc-eQTLs
Table S10	Functional enrichment results for pathways in CD8+ T cells
Table S11	Colocalized signals for CRHR1-IT1 and KANSL1-AS1
Table S12	956 up-regulated genes and 309 down-regulated genes by CRHR1-IT1
Table S13	48 key genes with MM > 0.75 and the absolute value of GS in the top 25%
Table S14	337 genes that may interact with CRHR1-IT1 predicted by AnnoLnc2
Table S15	ChIP-seq data from various cell types confirmed that JUN binds to CRHR1-IT1

## Sheet: Table S1
Table S1. Quality control of genotype data
QC steps	#Individuals	#Flagged samples	#SNPs kept	#SNPs removed
Original data	350		904985
1. Samples with inconsistent RNA-seq and Genotype Gender	350	0
2. Exclude monomorphic SNPs	350		896666	8319
3. Exclude SNPs with MAF<0.01	350		811463	85203
4. Exclude SNPs with HWE (p<1e-6)	350		810342	1121
5. Exclude SNPs call rate <95%	350		802511	7831
6. Exclude Individuals with call rate < 90%	350	0	802511
7. Exclude sample contamination	348	2	802511
8. Exclude SNPs located on sex chromosomes	348		771697	30814

## Sheet: Table S2
Table S2. Demographic and clinical characteristics of the HGSOC participants
	Primary Cohort
Subjects (n)	N=348
Initial pathologic diagnosis age	59.58 (11.38)
Race
American indian or alaska native (n)	2 (0.57%)
Asian (n)	5 (1.44%)
Black or african american (n)	16 (4.60%)
Native hawaiian or other pacific islander (n)	1 (0.29%)
White (n)	313 (89.94%)
Not available (n)	11 (3.16%)
Stage
Stage IIA (n)	2 (0.57%)
Stage IIB (n)	2 (0.57%)
Stage IIC (n)	11 (3.16%)
Stage IIIA (n)	7 (2.01%)
Stage IIIB (n)	14 (4.02%)
Stage IIIC (n)	255 (73.28%)
Stage IV (n)	53 (15.23%)
Not available (n)	4 (1.15%)
Grade
G1 (n)	1 (0.29%)
G2 (n)	36 (10.34%)
G3 (n)	301 (86.49%)
G4 (n)	1 (0.29%)
GB (n)	1 (0.29%)
GX (n)	5 (1.44%)
Not available (n)	3 (0.86%)
Survival Days	1,014 (832.73)
Data are mean (SD) or n (%), which are reported as counts for discrete variables and reported as mean and SD for continuous variables.

## Sheet: Table S3
Table S3. Sequencing information for human HGSOC snRandom-seq samples
ASSAY_name	COND_name	SAMP_id	SAMPLE_sid	SAMPLE_name	SAMPLE_type	SAMPLE_ReagentKit	SAMPLE_subd	SAMPLE_Status	Run	Lane	Geometry
SnRandom-seq	HGSOC	FFPE_A1366	A1366	H_HGSOC_snRandom_Sam1366	ScRNA-seq library	VITApilote	2022-02-05	QC	SQSJCX240203004	Lane1	NovaseqX-plus/150x8x8x150/150PE
SnRandom-seq	HGSOC	FFPE_A1367	A1367	H_HGSOC_snRandom_Sam1367	ScRNA-seq library	VITApilote	2022-02-05	QC	SQSJCX240203004	Lane1	NovaseqX-plus/150x8x8x150/150PE

## Sheet: Table S4
Table S4. Sequence of lncRNA CRHR1-IT1
LncRNA	Sequence
CRHR1-IT1	GAAGATTCCCCGCCCCCACTTCTAGGCTTGGTTGAACCGTGCAGATACCTTCTCGAAACAAAAGATTTTCCTACCTGCTTATACTTGGTAACCGAGGGAATTTCTAAGACTTCTTGCTCATTTCTGAGTATTGTCTTTATATCCTGACACTATGAATGCTACTTGGATGCCTCTTAAGGGTCTCTTCTGCAGGGTCCCCATGAATTGTGGCTGAAGTTGTGCACAAACAAGTATCTCCAGTGACAGGAGTGCCTTCTGAGGCAGCCATTGCATCTTCATCTGCTGACACTCTGCTAGGCTGACTTCTGTAGTTTTCACCACTGATCTTCAGTCCACCTCACAGAGCTCTATAAAACGCTTAAATCCTCTTTACATCATAGACTTTCAGCTACTTGAAGA…

## Sheet: Table S5
Table S5. Primer sequences for qRT-PCR
Gene	Strand	Primer sequence
CRHR1	Forward	TGCCAGGAGATCCTCAATGAGG
	Reverse	AGCCGCAGAAAGAGGACAAAGG
JUN	Forward	CCTTGAAAGCTCAGAACTCGGAG
	Reverse	TGCTGCGTTAGCATGAGTTGGC
FAS	Forward	GACCCTCCTACCTCTGGTTCT
	Reverse	ACCTGGAGGACAGGGCTTAT
CMYC	Forward	TCTCCGTCCTCGGATTCTCT
	Reverse	TTCTTGTTCCTCCTCAGAGTCG
PARP1	Forward	AGCGTGTTTCTAGGTCGTGG
	Reverse	CATCAAACATGGGCGACTGC

## Sheet: Table S6
Table S6. The lncRNA-eQTL analysis identified 572 elncRNAs
Symbol	Chr	Start	End
FAM87B	chr1	750070	752816
FAM87B	chr1	752751	755214
LINC00337	chr1	6296300	6299504
LOC102724825	chr1	13745938	13755337
LOC101927441	chr1	15724853	15737542
RP1-224A6.3	chr1	22350318	22352541
LINC00339	chr1	22351684	22358710
LOC101928189	chr1	25630864	25664746
LOC101928189	chr1	25643926	25644797
LOC646471	chr1	26146445	26150097
LINC01137	chr1	37914412	37940044
GJA9-MYCBP	chr1	39341868	39351423
LOC102723924	chr1	41692509	41800607
SLC2A1-AS1	chr1	43424720	43449029
LOC102724125	chr1	53795082	53903586
SSBP3-AS1	chr1	54698879	54747130
RP4-782L23.1	chr1	60238467	60254538
ZRANB2-AS1	chr1	71478040	71536574
RP5-887A10.1	chr1	81049872	81242290
LOC101927773	chr1	85062206	85086870
C1orf180	chr1	85093614	85101064
LOC101927952	chr1	90224336	90233743
LOC101927975	chr1	90239624	90256051
RP11-57H12.3	chr1	95613365	95699651
LOC100996630	chr1	95771370	95787102
LAMTOR5-AS1	chr1	110950431	110958896
LOC101930375	chr1	113541738	113550821
RP11-418J17.1	chr1	119683041	119742893
LOC102724451	chr1	143913455	143914948
LINC00623	chr1	144276459	144289838
LOC100996741	chr1	144322231	144341736
LOC101929788	chr1	144555856	144591727
LINC00624	chr1	146977145	146989321
LOC102724893	chr1	147805613	147816392
LOC101927929	chr1	151763112	151772451
FLG-AS1	chr1	152159626	152339275
LOC101928059	chr1	153895886	153907713
RP11-506O24.1	chr1	164733031	164745747
LOC102724528	chr1	172338671	172449434
LOC102724541	chr1	172338671	172366339
RASAL2-AS1	chr1	178060643	178063128
C1orf220	chr1	178507557	178511943
RP11-92G12.3	chr1	200638609	200663378
LOC284581	chr1	205781868	205875038
LOC101930114	chr1	209834700	209897463
LINC00467	chr1	211605804	211608971
RP11-15I11.3	chr1	212371613	212458583
RP11-61J19.3	chr1	212730090	212738415
FLVCR1-AS1	chr1	213027910	213031480
HLX-AS1	chr1	221044790	221054397
RP11-191N8.2	chr1	221964234	222013720
LOC100506161	chr1	222762287	222777211
LOC441124	chr1	224139095	224140127
LOC101927143	chr1	224393069	224407179
LOC101928291	chr1	224632671	224646892
LOC101927247	chr1	226374470	226400850
RP5-858B6.3	chr1	231004840	231014944
LOC102724041	chr1	231598283	231664729
LOC101927765	chr1	234484068	234510042
LINC01115	chr2	714113	891992
LOC101927578	chr2	3452020	3457705
RNASEH1-AS1	chr2	3605976	3614783
LINC00487	chr2	6869300	6913492
AC011747.4	chr2	8516670	8723965
LOC102724935	chr2	20096382	20101458
AC079145.4	chr2	20189519	20204567
AC016995.3	chr2	38633247	38763831
LOC102724243	chr2	65284992	65296480
LOC102724515	chr2	75151048	75160151
LOC101927861	chr2	75165477	75175745
LOC90784	chr2	86247339	86250991
LOC101928347	chr2	88436725	88472704
LOC102724805	chr2	88935208	88991115
LOC102724774	chr2	108659802	108905069
FLJ42351	chr2	113399405	113403477
PAX8-AS1	chr2	113993846	114024600
LOC101927400	chr2	114103599	114113914
AC104653.1	chr2	114575583	114648607
LOC100506797	chr2	118940498	118944015
FAR2P1	chr2	130778607	130826057
FAR2P1	chr2	130794259	130797918
FAR2P3	chr2	131446926	131476532
LOC101929356	chr2	152644907	152648537
LOC102723926	chr2	160491813	160568950
LOC100505984	chr2	161114154	161128406
AC009299.3	chr2	162101246	162107508
AC009299.3	chr2	162101339	162103026
LOC100506124	chr2	166713985	166728451
SCRN3	chr2	175276636	175287680
AC074286.1	chr2	178175819	178188035
AC007966.1	chr2	186584422	186664866
LOC101927252	chr2	190058455	190306057
AC020571.3	chr2	197124748	197129155
LOC101927596	chr2	198062678	198064389
LOC101927687	chr2	200759069	200775890
LOC102724650	chr2	203168403	203231194
LOC102724675	chr2	208051098	208394392
IDH1-AS1	chr2	209119957	209120918
AC072062.1	chr2	215673896	215877910
LOC102723421	chr2	219487609	219501276
AC073128.10	chr2	219771802	219790814
LINC00471	chr2	232329322	232379105
LOC101928881	chr2	233877565	233880491
AGAP1-IT1	chr2	236412035	236416211
LOC101927174	chr3	154114	173014
GHRLOS	chr3	10322636	10335133
LINC00852	chr3	10326103	10327430
LOC101927725	chr3	16003432	16178166
LOC101927725	chr3	16008779	16009617
RBMS3-AS3	chr3	29305664	29322430
ENTPD3-AS1	chr3	40365237	40495917
CCDC13-AS1	chr3	42774067	42794761
LRRC2-AS1	chr3	46598514	46605096
LOC101928814	chr3	49030400	49036419
LOC101928814	chr3	49035874	49037216
LOC101929296	chr3	61596947	61617519
SYNPR-AS1	chr3	63023342	63631452
RP11-81N13.1	chr3	67705096	67998340
LINC00877	chr3	72084670	72150294
LINC00960	chr3	75713487	75785941
ZNF717	chr3	75779154	75785941
ST3GAL6-AS1	chr3	98433177	98451495
LOC101929485	chr3	106086834	106104598
LINC00635	chr3	107555490	107596915
LINC00636	chr3	107596962	107655951
RP11-572M11.3	chr3	112861197	112886666
RP11-379B18.5	chr3	125590916	125609263
RP11-475N22.4	chr3	128212138	128226749
RP11-723O4.2	chr3	128578457	128602359
LOC102723877	chr3	129831162	129869327
RP11-402L6.1	chr3	132963027	132976119
RYK	chr3	133870840	133876051
RP11-85F14.5	chr3	136551042	136580905
LOC100289361	chr3	142702569	142720309
LOC100507461	chr3	147794188	147806164
TM4SF1-AS1	chr3	149095565	149104370
CLRN1-AS1	chr3	150793056	150804202
LOC102724289	chr3	152323326	152397249
TIPARP-AS1	chr3	156387088	156393745
LOC101928236	chr3	156893031	156909290
RP11-538P18.2	chr3	158263009	158288855
LOC102724699	chr3	186527192	186547630
FLJ42393	chr3	187895524	187899716
LOC101929198	chr3	193206860	193273374
RP11-699L21.1	chr3	193675161	193852778
LOC100505902	chr3	193723420	193852804
GAK	chr4	862474	865539
LOC101928676	chr4	1289245	1294451
STX18-AS1	chr4	4647698	4702988
LOC101928803	chr4	9143807	9154396
LOC101928948	chr4	9533585	9609872
LOC101928948	chr4	9565541	9672330
LOC102723659	chr4	22346664	22365913
SEPSECS-AS1	chr4	25162057	25214242
FLJ13197	chr4	38603930	38666249
LOC101927133	chr4	47465823	47472496
USP46-AS1	chr4	53525520	53537847
IGFBP7-AS1	chr4	57975928	58071465
UBA6-AS1	chr4	68566346	68611892
LOC102724780	chr4	68566982	68689933
LOC550113	chr4	68884237	68946693
LOC102724832	chr4	74135562	74219324
LOC101928702	chr4	75917423	76052420
LINC01088	chr4	79860635	80238341
THAP9-AS1	chr4	83814202	83825397
LOC102723358	chr4	85463508	85492879
LOC102723488	chr4	89684329	89705233
FLJ20021	chr4	102267665	102270150
RP11-286E11.1	chr4	108807943	108814667
SNHG8	chr4	119199917	119200978
LINC01061	chr4	120324771	120333535
LOC101926936	chr4	120362064	120366503
LOC645513	chr4	120375770	120488671
LOC102724501	chr4	142234911	142241027
RP11-18H21.1	chr4	153008362	153025872
DKFZP434I0714	chr4	153455965	153460469
LOC102724785	chr4	157032669	157065120
LOC102724842	chr4	159120070	159313957
LOC101928028	chr4	159798322	159801067
LOC101930370	chr4	174080517	174087937
RP11-148L24.1	chr4	175012403	175041691
LOC101928783	chr4	184643927	184689673
FLJ38576	chr4	187110186	187112644
LOC102723950	chr4	189184455	189195311
LINC01060	chr4	189357902	189602437
LOC102467073	chr5	269671	271639
LOC102724884	chr5	1611699	1629581
LOC101929034	chr5	1856084	1876969
FLJ33360	chr5	6102873	6350711
LOC102724943	chr5	6765832	6795736
LOC102723459	chr5	11289309	11304341
LOC646719	chr5	36859402	36876884
EGFLAM-AS2	chr5	38399916	38423736
EGFLAM-AS2	chr5	38399916	38423736
LOC101926904	chr5	38710469	38845931
LOC642366	chr5	50666916	50679166
LOC102467080	chr5	53955980	54040086
CKMT2-AS1	chr5	80529131	80597401
LOC731157	chr5	89704966	89712459
LOC101929687	chr5	94033627	94050623
LOC102546227	chr5	96528864	97324743
LOC100289230	chr5	98264838	98266713
LOC102723929	chr5	141543449	141548528
AC005592.2	chr5	141704648	141760131
LOC102724061	chr5	149014622	149022837
LOC102546298	chr5	149855079	149865555
LOC101928136	chr5	173134224	173173337
LOC101928247	chr5	177205257	177221397
RMND5B	chr5	177558394	177573112
LOC102724758	chr5	180253870	180255469
TRIM52-AS1	chr5	180688213	180699308
LOC102723958	chr6	1526894	1555743
LOC100507336	chr6	3588866	3720354
RP1-256G22.2	chr6	5657293	5696159
LY86-AS1	chr6	6367456	6381973
LOC101928047	chr6	6710531	6761999
LOC101928146	chr6	10483608	10521775
LOC102724361	chr6	11249410	11252246
LOC102724520	chr6	15695026	15758422
LOC102724591	chr6	17585955	17599239
LOC100506885	chr6	19707673	19805506
LOC285819	chr6	26470099	26482737
LOC102724889	chr6	28046570	28048770
C6orf100	chr6	28911489	28912424
HCG4	chr6	29758808	29760850
HCG4B	chr6	29892369	29894992
ZNRD1-AS1	chr6	29968788	30028961
HCG8	chr6	29979878	29981699
HCG17	chr6	30201816	30293911
PSORS1C3	chr6	31141402	31154281
LOC101929072	chr6	31362084	31368247
HCG26	chr6	31439006	31440185
LOC100507547	chr6	32120579	32122142
LOC101929188	chr6	33598745	33601539
LOC102723648	chr6	36112357	36164332
LOC102723882	chr6	42130146	42144226
LOC730101	chr6	52529184	52533955
LOC100996497	chr6	58272113	58275236
LOC100996497	chr6	58273445	58285303
LOC100996497	chr6	58273629	58277509
SNHG5	chr6	86369129	86394121
RP11-98I9.4	chr6	99872730	99880204
ARMC2-AS1	chr6	109229107	109249285
TRAF3IP2-AS1	chr6	111804675	111923498
FLJ46906	chr6	139012805	139018720
RP11-436I24.1	chr6	143869988	143892597
RAET1E-AS1	chr6	150182512	150240644
LOC101928946	chr6	157731226	157737148
LOC102724169	chr6	166745271	166755685
LOC100289495	chr6	166756119	166765938
LOC102724220	chr6	167654124	167681311
KIF25-AS1	chr6	168376535	168397929
LOC101929670	chr6	170706490	170709344
LOC101929891	chr6	170775590	170777712
LOC102723758	chr7	1163183	1175448
AC091729.9	chr7	1199920	1205769
LOC102723800	chr7	1659071	1697039
LOC101927354	chr7	7294785	7321855
LOC100505938	chr7	8275635	8430408
ISPD-AS1	chr7	16247699	16310636
LOC101927841	chr7	22891350	22924893
KLHL7-AS1	chr7	23139569	23145322
LOC441204	chr7	26438223	26581526
LOC646762	chr7	29672976	29790298
LOC401320	chr7	30536230	30624514
LOC101928421	chr7	35652728	35662895
LINC00525	chr7	47800096	47806486
DDC	chr7	50518142	50526186
LOC102723656	chr7	55819302	55826768
LOC101929381	chr7	64533192	64569376
LOC101929266	chr7	64535257	64544724
LOC101929414	chr7	65235887	65290442
LOC102724918	chr7	65291416	65300343
LOC100289098	chr7	65958671	65960461
RP4-756H11.3	chr7	66117904	66134589
RP11-166O4.5	chr7	66798399	66834910
LINC00035	chr7	73139892	73150497
LOC100133091	chr7	76178658	76280905
DTX2P1-UPK3BP1-PMS2P11	chr7	76634082	76641158
RSBN1L-AS1	chr7	77282443	77326662
MAGI2-AS3	chr7	79082273	79100650
LOC101927446	chr7	89964537	89973443
LOC101927525	chr7	93903495	94024874
RP11-132A1.4	chr7	100951561	100964430
KMT2E-AS1	chr7	104634156	104654588
LOC101927974	chr7	107383198	107384814
C7orf66	chr7	108524032	108527056
LOC101928915	chr7	135444845	135620960
WEE2-AS1	chr7	141403344	141438030
WDR86-AS1	chr7	151093182	151113797
LINC01003	chr7	152161121	152162870
PAXIP1-AS2	chr7	154720184	154744142
C7orf13	chr7	156426773	156433348
LOC101927566	chr8	215119	224432
LOC101927566	chr8	217552	224345
ERICH1	chr8	581026	607599
FAM85A	chr8	12051713	12060181
FAM85A	chr8	12059731	12077571
LOC101928998	chr8	12359452	12368623
LOC101929092	chr8	18515937	18530645
LOC100507071	chr8	22108607	22132687
LOC101929492	chr8	31133247	31248322
NPM1P6	chr8	62057752	62126069
GS1-251I9.4	chr8	92038394	92082400
GS1-251I9.4	chr8	92075921	92081877
LOC101926977	chr8	95565891	95583215
LOC100506538	chr8	95970462	96004682
LOC100506753	chr8	103876409	103984636
LOC101930033	chr8	128265424	128433588
LOC101927963	chr8	142133629	142140233
LOC102723988	chr8	145986269	145997374
VLDLR-AS1	chr9	2535652	2622373
RP11-509J21.1	chr9	3541696	3700351
LOC101929351	chr9	4668743	4679613
FLJ41200	chr9	13404972	13488809
TOPORS-AS1	chr9	32551142	32570703
LOC101926900	chr9	34984325	34989376
MAMDC2-AS1	chr9	72702248	72873790
LOC101927086	chr9	73077735	73223222
RP11-63P12.6	chr9	74920290	74966303
RP11-276H19.1	chr9	89611144	89613506
LOC101927935	chr9	94614219	94615256
RP11-342C23.4	chr9	97330986	97333602
LINC00476	chr9	98518693	98640771
LOC101930476	chr9	98518693	98536299
LOC100996557	chr9	99445462	99536888
LOC101928382	chr9	100764274	100779441
LOC101929953	chr9	114389702	114393556
PSMD5-AS1	chr9	123605285	123617913
PITRM1-AS1	chr10	3183793	3190821
SFTA1P	chr10	10826398	10836930
PROSER2-AS1	chr10	11925569	11929909
LOC101928701	chr10	16566829	16581767
LINC00836	chr10	25940380	26022906
LINC00836	chr10	25966750	26061046
LINC00264	chr10	26877238	26883253
ZEB1-AS1	chr10	31493547	31608604
PARD3-AS1	chr10	35104696	35105350
TMEM72-AS1	chr10	45288909	45455137
LOC101927699	chr10	46951449	46968463
LOC102724593	chr10	46951472	46966817
LOC101929846	chr10	65389936	65447029
ZNF503-AS1	chr10	77005099	77130420
LOC102723616	chr10	81448761	81483691
TMEM254-AS1	chr10	81805989	81838949
NUTM2A-AS1	chr10	88975940	89115753
LOC439994	chr10	89102168	89104159
LINC00865	chr10	91589250	91600768
TNKS2-AS1	chr10	93542593	93558080
RP11-127L20.3	chr10	106065865	106098003
ATE1-AS1	chr10	123687683	123713527
LOC102724967	chr10	134137199	134145725
MIR210HG	chr11	565572	568472
LOC143666	chr11	571658	575388
LOC100506518	chr11	777698	784082
NS3BP	chr11	779454	780755
KRTAP5-AS1	chr11	1593848	1621376
FAM99A	chr11	1686666	1690156
LOC101927800	chr11	5603073	5667089
LOC100506258	chr11	7441309	7487292
LOC101927894	chr11	7447197	7449276
TMEM9B-AS1	chr11	8986222	8999446
LOC644656	chr11	9479374	9482245
MRVI1-AS1	chr11	10562783	10621479
LINC00958	chr11	12951884	13030815
WT1-AS	chr11	32456806	32530983
LOC102723568	chr11	34693400	34903148
RP11-430H10.1	chr11	45376906	45389125
DKFZp779M0652	chr11	45790564	45794548
LOC102723745	chr11	61785261	61787576
NEAT1	chr11	65191388	65219270
SSSCA1-AS1	chr11	65333482	65338923
LOC101928090	chr11	66231695	66233910
LOC102724131	chr11	66241312	66242443
LOC101928069	chr11	66244817	66247873
RP11-554A11.8	chr11	68912096	68939030
RP11-554A11.8	chr11	68912953	68932936
LOC102724544	chr11	74563130	74564156
KCTD21-AS1	chr11	77850839	77885023
RP11-736K20.6	chr11	86666662	86732398
LOC102723746	chr11	92970151	93119466
LOC101928477	chr11	102473236	102558631
LOC101928586	chr11	108790927	108794663
LOC101928774	chr11	112208879	112256710
LOC101928774	chr11	112244657	112256710
LOC102724266	chr11	118529014	118559201
LOC102724266	chr11	118543378	118566398
LOC101929133	chr11	118756836	118764096
RP11-677M14.7	chr11	124670324	124704383
RP11-677M14.7	chr11	124674921	124680511
LOC101929432	chr12	798919	837566
LOC101929449	chr12	1192754	1194842
LOC642846	chr12	9436253	9570342
LOC642846	chr12	9438976	9599688
LOC642846	chr12	9447952	9589509
LOC101930452	chr12	9466824	9564507
LOC101930452	chr12	9474556	9562412
LOC100506159	chr12	10088901	10096094
PRH1-PRR4	chr12	10968526	11324224
RP11-434C1.1	chr12	11700822	11775237
RP11-996F15.2	chr12	29429928	29474459
LOC101929027	chr12	31516410	31523125
LOC102723881	chr12	49187668	49196139
LINC00592	chr12	52543994	52617811
HOXC-AS1	chr12	54385622	54393937
FLJ12825	chr12	54452038	54559267
LOC102724030	chr12	54526722	54567509
LOC101927719	chr12	62872074	62881717
IFNG-AS1	chr12	68322225	68781078
RP11-486A14.2	chr12	93387705	93771563
LOC102724933	chr12	93573191	93575438
RP11-486A14.2	chr12	93752596	93771232
LOC101928830	chr12	96396849	96406826
LOC100131138	chr12	111374406	111375252
LINC00173	chr12	116971214	117002055
FZD10-AS1	chr12	130602512	130636209
RP11-638F5.1	chr12	131649556	131723608
LOC100996246	chr12	132671176	132677824
LOC101928898	chr13	25498811	25500032
LOC102723345	chr13	30221774	30252711
SMIM2-AS1	chr13	44684685	44819174
CPB2-AS1	chr13	46626983	46675482
LINC00563	chr13	46848830	46895906
DLEU2	chr13	50639513	50641498
RNASEH2B-AS1	chr13	51450641	51484848
RBM26-AS1	chr13	79980333	80001660
LOC102724065	chr13	80130462	80146365
LOC102724139	chr13	81470392	81478671
LINC00379	chr13	91779197	91863952
GPC5-AS1	chr13	93350768	93441580
DOCK9-AS1	chr13	99484338	99486883
DOCK9-AS2	chr13	99738725	99740879
PCCA-AS1	chr13	101115776	101133269
RP11-298I3.1	chr14	23398818	23425656
LOC101927045	chr14	24912235	24948206
ARHGAP5-AS1	chr14	32544625	32545905
SNX6	chr14	35047596	35055199
LOC101927291	chr14	37125313	37126387
LOC101927395	chr14	45141416	45268072
LINC00871	chr14	46360261	46975352
KTN1-AS1	chr14	55923749	56046915
LOC102723670	chr14	56166174	56439206
LINC00520	chr14	56247853	56263394
LOC100128233	chr14	65619397	65769506
RAD51B	chr14	68918526	69035047
RP5-1021I20.1	chr14	74253247	74284019
LOC102724190	chr14	77535441	77552749
LINC00642	chr14	90919669	90925496
LOC101929922	chr15	30434396	30437632
LOC102724214	chr15	36399238	36474685
LOC101928388	chr15	42264939	42337144
LOC101928414	chr15	45534576	45571539
GABPB1-AS1	chr15	50646371	50664940
DYX1C1-CCPG1	chr15	55759396	55783311
ANP32A-IT1	chr15	69096160	69099638
LOC102723714	chr15	74797555	74806493
LOC101929457	chr15	77817937	77865458
LOC102724079	chr15	84835299	84841914
LINC00933	chr15	85113880	85133497
ERVK13-1	chr16	2713338	2719479
LOC101929566	chr16	2916299	2918228
LOC101929613	chr16	3030603	3064507
RP11-473M20.14	chr16	3170649	3184971
LINC00921	chr16	3313768	3319049
ADCY9	chr16	4042297	4046996
LOC101927814	chr16	21601019	21610706
LOC102723428	chr16	21830649	21831703
FBXL19-AS1	chr16	30926637	30935779
LOC101928762	chr16	31053278	31060873
LOC102467079	chr16	52111704	52132980
LOC102723429	chr16	55458491	55470374
LOC102723429	chr16	55458491	55478762
LINC00922	chr16	65302770	65734610
PDXDC2P	chr16	69998319	70222171
LOC102723738	chr16	70140439	70162186
RP11-432I5.1	chr16	71595116	71606341
LOC102723936	chr16	74424769	74430239
LOC102723987	chr16	75155268	75173561
LOC102467146	chr16	79723868	79804628
LOC100996425	chr16	80860785	80918732
MTHFSD	chr16	86569050	86580820
SNAI3-AS1	chr16	88729717	88753594
LOC101928000	chr17	4931832	5017692
LOC100506974	chr17	13679943	13696554
MGC12916	chr17	14207057	14209062
FAM211A-AS1	chr17	16359492	16363230
LOC102724624	chr17	18995605	19001221
LOC102724624	chr17	18997163	18999681
LOC102724625	chr17	30406228	30415975
LOC102723486	chr17	35724535	35725728
RP11-242D8.1	chr17	41300385	41322488
ASB16-AS1	chr17	42253199	42264283
MGC57346	chr17	43697712	43715329
LOC102724391	chr17	44111654	44114207
KANSL1-AS1	chr17	44270939	44274092
LOC101927060	chr17	45110285	45177667
LOC101927060	chr17	45141765	45153933
LOC101928514	chr17	74788619	74804595
DNAH17-AS1	chr17	76480992	76499138
LOC102723939	chr17	77639853	77657176
LINC00470	chr18	976806	1315358
LINC00667	chr18	5237955	5246690
LOC101927168	chr18	6705956	6729861
RP11-692N5.1	chr18	9613298	9619365
LOC101927511	chr18	11910554	11948168
RP11-973H7.4	chr18	12774642	12783358
GATA6-AS1	chr18	19736986	19749402
LOC102723325	chr18	74277366	74323354
RAB11B-AS1	chr19	8439260	8455575
LOC101928238	chr19	9649415	9650404
LOC101928845	chr19	14430410	14456923
LOC102724251	chr19	14509408	14511761
UCA1	chr19	15935207	15949783
UCA1	chr19	15937805	15947196
LOC102724299	chr19	15957532	15976277
LOC102724279	chr19	15973727	15974619
LOC101929007	chr19	21733701	21776808
LOC101927170	chr19	28392089	28447623
LOC102724942	chr19	28901080	29218593
LOC101927210	chr19	28969887	29218593
AC007773.2	chr19	32878579	32898712
LOC102723513	chr19	35407272	35417761
AC002116.7	chr19	36524208	36525649
LINC00665	chr19	36811339	36821221
AC092295.7	chr19	37063969	37085612
AC012309.5	chr19	37742787	37821964
RP11-15A1.7	chr19	44470832	44507025
AC010524.2	chr19	49869143	49901282
LOC100506114	chr19	50987305	51005140
MGC45922	chr19	51309267	51322134
ZNF665	chr19	53681618	53689247
LOC101929177	chr19	59099415	59102292
FKBP1A-SDCBP2	chr20	1290553	1373816
LOC102724529	chr20	1391354	1404569
LOC101929125	chr20	3789141	3793081
LINC00654	chr20	5455123	5485357
LOC339593	chr20	11246662	11252604
LOC101929547	chr20	19182131	19193362
LOC100996695	chr20	25794548	25814786
LOC101926935	chr20	25825169	25834682
LOC101926935	chr20	25829519	25832801
LOC100134868	chr20	25991806	25999339
MMP24-AS1	chr20	33788903	33866090
SNHG17	chr20	37029206	37064018
RP4-705O1.1	chr20	37759820	37848390
RP11-445H22.3	chr20	43284885	43377648
LOC101927512	chr20	48778947	48789042
RP11-112L6.4	chr20	48787187	48800001
LOC101927744	chr20	52136246	52142297
LOC102723590	chr20	55784365	55794894
C21orf15	chr21	15215454	15272233
LOC102724267	chr21	19191818	19349641
LINC00189	chr21	30565673	30661338
C21orf119	chr21	33765442	33766269
AP000688.8	chr21	37376366	37396088
DSCR9	chr21	38580709	38614615
DGCR9	chr22	19005347	19007761
DGCR10	chr22	19009950	19011851
LOC100506454	chr22	19018650	19021899
DGCR11	chr22	19033675	19035888
LOC101928824	chr22	20850211	20853656
LOC101928891	chr22	21307506	21318982
THAP7-AS1	chr22	21354829	21364703
TMEM191C	chr22	21821459	21827096
BMS1P20	chr22	22311824	23265085
LOC102724759	chr22	23923067	23925662
LOC284889	chr22	24232709	24268873
LOC284889	chr22	24235897	24241117
LOC100507599	chr22	26908508	26921787
RP1-149A16.3	chr22	32770048	32783559
APOBEC3B-AS1	chr22	39387564	39394225
LOC100506472	chr22	39828165	39834324

## Sheet: Table S7
Table S7. Differentially expressed genes (404 PCGs and 94 lncRNAs) potentially driven by underlying germline variants
Gene	ID	Chr	Start	End	Strand	LogFC	T.stat	P.value	Adj.P.value	Regulation	Type
AADACP1	ENSG00000240602.7	chr3	151770428	151784894	+	1.12	9.17	1.22e-18	3.48e-18	Up-regulated genes	lncRNA
ABCC8	ENSG00000006071.11	chr11	17392885	17476845	-	-1.09	-23.67	6.38e-84	9.44e-83	Down-regulated genes	protein_coding
ABHD11-AS1	ENSG00000225969.1	chr7	73735038	73736054	+	1.94	11.56	1.35e-27	5.01e-27	Up-regulated genes	lncRNA
AC000078.5	ENSG00000232926.1	chr22	19887289	19887970	+	-1.55	-40.67	1.63e-161	1.71e-159	Down-regulated genes	lncRNA
AC004623.3	ENSG00000279488.1	chr19	1372238	1374364	-	-1.92	-39.14	4.39e-155	3.77e-153	Down-regulated genes	others
AC125232.1	ENSG00000231259.4	chr2	87031815	87053069	-	-1.02	-12	2.22e-29	8.64e-29	Down-regulated genes	lncRNA
ACCS	ENSG00000110455.13	chr11	44065925	44084222	+	-2.28	-23.82	1.21e-84	1.82e-83	Down-regulated genes	protein_coding
ACOX2	ENSG00000168306.12	chr3	58505136	58537319	-	-2.28	-20.95	1.31e-70	1.4e-69	Down-regulated genes	protein_coding
ADAMDEC1	ENSG00000134028.14	chr8	24384285	24406013	+	1.36	9.62	3.19e-20	9.56e-20	Up-regulated genes	protein_coding
ADH1C	ENSG00000248144.5	chr4	99336492	99353027	-	-1.79	-23.27	6.12e-82	8.66e-81	Down-regulated genes	protein_coding
ADHFE1	ENSG00000147576.15	chr8	66430185	66471601	+	-3.61	-37.77	2.87e-149	2.16e-147	Down-regulated genes	protein_coding
AGAP4	ENSG00000188234.13	chr10	45825594	45853875	-	-1.66	-18.29	1.05e-57	8.33e-57	Down-regulated genes	protein_coding
AGPAT9	ENSG00000138678.10	chr4	83535914	83605875	+	-3.18	-43.24	5.81e-172	7.91e-170	Down-regulated genes	protein_coding
AKAP13	ENSG00000170776.19	chr15	85380571	85749358	+	-1.76	-21.11	2.1e-71	2.28e-70	Down-regulated genes	protein_coding
ALDH1L1	ENSG00000144908.13	chr3	126103562	126197994	-	-4.34	-36.31	5.9e-143	3.76e-141	Down-regulated genes	protein_coding
ALDH9A1	ENSG00000143149.12	chr1	165662216	165698863	-	-1.02	-13.28	9.55e-35	4.32e-34	Down-regulated genes	protein_coding
ALMS1P	ENSG00000163016.9	chr2	73644919	73685576	+	-1.22	-33.52	1.55e-130	7.11e-129	Down-regulated genes	lncRNA
ALOX5	ENSG00000012779.10	chr10	45374176	45446119	+	1.2	8.42	3.9e-16	1.02e-15	Up-regulated genes	protein_coding
AMZ2P1	ENSG00000214174.8	chr17	64966550	64975576	-	-2.11	-30.51	1.02e-116	3.32e-115	Down-regulated genes	lncRNA
ANKFY1	ENSG00000185722.16	chr17	4163907	4263977	-	-1.24	-12.66	4.25e-32	1.78e-31	Down-regulated genes	protein_coding
ANKRA2	ENSG00000164331.9	chr5	73552335	73565686	-	-2.26	-30.5	1.21e-116	3.94e-115	Down-regulated genes	protein_coding
ANKRD36	ENSG00000135976.16	chr2	97113496	97264521	+	-2.49	-36.37	3.44e-143	2.2e-141	Down-regulated genes	protein_coding
ANKRD36B	ENSG00000196912.12	chr2	97492663	97589965	-	-2.04	-25.39	2.65e-92	4.76e-91	Down-regulated genes	protein_coding
ANO9	ENSG00000185101.12	chr11	417933	442011	-	2.86	22.1	3.02e-76	3.72e-75	Up-regulated genes	protein_coding
AP000892.6	ENSG00000280143.1	chr11	117204967	117210292	+	-1.9	-15.64	2.91e-45	1.72e-44	Down-regulated genes	others
APBA1	ENSG00000107282.7	chr9	69427530	69672306	-	-1.62	-23.92	3.89e-85	5.9e-84	Down-regulated genes	protein_coding
APOBEC3B	ENSG00000179750.15	chr22	38982347	38992804	+	2.6	17.39	2.01e-53	1.44e-52	Up-regulated genes	protein_coding
APOC2	ENSG00000234906.8	chr19	44946035	44949565	+	2	13.39	3.16e-35	1.45e-34	Up-regulated genes	protein_coding
APOC4-APOC2	ENSG00000224916.8	chr19	44942238	44949565	+	2.62	17.1	4.79e-52	3.31e-51	Up-regulated genes	protein_coding
ARHGEF35	ENSG00000213214.4	chr7	144186083	144195655	-	1.83	15.33	7.64e-44	4.38e-43	Up-regulated genes	protein_coding
ARL17A	ENSG00000185829.15	chr17	46516702	46579722	-	-1.53	-16.26	3.98e-48	2.51e-47	Down-regulated genes	protein_coding
ATAD3B	ENSG00000160072.19	chr1	1471769	1497848	+	-1.58	-16.33	1.81e-48	1.16e-47	Down-regulated genes	protein_coding
ATL1	ENSG00000198513.11	chr14	50532509	50633068	+	-1.17	-17.1	4.53e-52	3.14e-51	Down-regulated genes	protein_coding
ATM	ENSG00000149311.17	chr11	108222484	108369102	+	-2.27	-27.35	9.54e-102	2.16e-100	Down-regulated genes	protein_coding
ATP6AP1L	ENSG00000205464.11	chr5	82279462	82386977	+	-1.33	-16.45	5.04e-49	3.25e-48	Down-regulated genes	protein_coding
ATP6V1B1	ENSG00000116039.11	chr2	70935882	70965406	+	4.9	25.26	1.23e-91	2.19e-90	Up-regulated genes	protein_coding
ATPIF1	ENSG00000130770.17	chr1	28236109	28246906	+	1.05	11.63	7.05e-28	2.64e-27	Up-regulated genes	protein_coding
AURKA	ENSG00000087586.17	chr20	56369389	56392337	-	1.7	13.65	2.55e-36	1.2e-35	Up-regulated genes	protein_coding
B3GNT9	ENSG00000237172.3	chr16	67148105	67151214	-	-1.28	-13.25	1.29e-34	5.81e-34	Down-regulated genes	protein_coding
BAZ2A	ENSG00000076108.11	chr12	56595596	56636816	-	-1.18	-11.63	7.34e-28	2.74e-27	Down-regulated genes	protein_coding
BBS2	ENSG00000125124.11	chr16	56466836	56520283	-	-2.02	-24.82	1.58e-89	2.65e-88	Down-regulated genes	protein_coding
BCL10	ENSG00000142867.12	chr1	85266248	85277090	-	1.23	17.99	2.82e-56	2.17e-55	Up-regulated genes	protein_coding
BMP6	ENSG00000153162.8	chr6	7726797	7881422	+	-1.37	-11.71	3.29e-28	1.24e-27	Down-regulated genes	protein_coding
BMP7	ENSG00000101144.12	chr20	57168748	57266629	-	4.12	17.54	4e-54	2.91e-53	Up-regulated genes	protein_coding
BMS1P1	ENSG00000204177.10	chr10	46786674	46811989	+	-1.1	-21.93	2.11e-75	2.54e-74	Down-regulated genes	lncRNA
C11orf80	ENSG00000173715.15	chr11	66744451	66843328	+	1.31	16.68	4.55e-50	3.01e-49	Up-regulated genes	protein_coding
C1orf204	ENSG00000188004.9	chr1	159834474	159855347	-	-1.53	-22.5	3.46e-78	4.49e-77	Down-regulated genes	protein_coding
C1orf43	ENSG00000143612.18	chr1	154206706	154220628	-	1.18	16.53	2.11e-49	1.37e-48	Up-regulated genes	protein_coding
C20orf194	ENSG00000088854.12	chr20	3249305	3407625	-	-1.82	-24.07	7.39e-86	1.14e-84	Down-regulated genes	protein_coding
C3	ENSG00000125730.16	chr19	6677704	6730562	-	1.47	6.2	1.16e-09	2.35e-09	Up-regulated genes	protein_coding
C4A	ENSG00000244731.7	chr6	31982024	32002681	+	-1.61	-8.31	9.14e-16	2.35e-15	Down-regulated genes	protein_coding
C6	ENSG00000039537.13	chr5	41142234	41261438	-	-2.36	-28.55	1.83e-107	4.72e-106	Down-regulated genes	protein_coding
C6orf15	ENSG00000204542.2	chr6	31111223	31112559	-	1.29	7.02	7.13e-12	1.59e-11	Up-regulated genes	protein_coding
C6orf3	ENSG00000255389.1	chr6	111599875	111602295	+	-1.82	-33.03	2.51e-128	1.09e-126	Down-regulated genes	lncRNA
C7orf73	ENSG00000243317.7	chr7	135662496	135693418	+	1.63	22.65	6.29e-79	8.28e-78	Up-regulated genes	protein_coding
C8orf46	ENSG00000169085.11	chr8	66460003	66518524	+	-2.14	-31.46	4.02e-121	1.45e-119	Down-regulated genes	protein_coding
CATSPER2	ENSG00000166762.16	chr15	43628503	43668118	-	-1.85	-22.19	1.13e-76	1.4e-75	Down-regulated genes	protein_coding
CBLN3	ENSG00000139899.10	chr14	24426532	24430954	-	-1.26	-13.53	7.77e-36	3.61e-35	Down-regulated genes	protein_coding
CBR3	ENSG00000159231.5	chr21	36134912	36146566	+	-1.25	-10.81	1.21e-24	4.12e-24	Down-regulated genes	protein_coding
CCDC167	ENSG00000198937.8	chr6	37482920	37499922	-	2.69	27.1	1.48e-100	3.25e-99	Up-regulated genes	protein_coding
CCDC170	ENSG00000120262.9	chr6	151494030	151621193	+	-1.08	-10.96	3.23e-25	1.12e-24	Down-regulated genes	protein_coding
CCDC36	ENSG00000173421.16	chr3	49198428	49258104	+	-1.89	-42.71	8.08e-170	1.04e-167	Down-regulated genes	protein_coding
CCL4	ENSG00000275302.1	chr17	36103590	36105621	+	1.85	12.89	4.66e-33	2.01e-32	Up-regulated genes	protein_coding
CCNH	ENSG00000134480.13	chr5	87391494	87413019	-	-1.24	-16.95	2.26e-51	1.54e-50	Down-regulated genes	protein_coding
CCNL2	ENSG00000221978.11	chr1	1385711	1399328	-	-3.03	-26.72	1.07e-98	2.25e-97	Down-regulated genes	protein_coding
CCNO	ENSG00000152669.8	chr5	55231152	55233680	-	1.25	8.43	3.74e-16	9.76e-16	Up-regulated genes	protein_coding
CCNT2	ENSG00000082258.12	chr2	134918235	134959342	+	-1.67	-20.36	1.01e-67	1.01e-66	Down-regulated genes	protein_coding
CCT6P3	ENSG00000234585.6	chr7	65038354	65074713	+	-1.49	-23.13	2.98e-81	4.14e-80	Down-regulated genes	lncRNA
CD300A	ENSG00000167851.13	chr17	74466416	74484796	+	1.08	10.63	5.78e-24	1.94e-23	Up-regulated genes	protein_coding
CD52	ENSG00000169442.8	chr1	26317957	26320523	+	3.05	19.12	9.9e-62	8.61e-61	Up-regulated genes	protein_coding
CDCA7	ENSG00000144354.13	chr2	173354820	173368997	+	2.43	18.84	2.36e-60	1.99e-59	Up-regulated genes	protein_coding
CECR1	ENSG00000093072.15	chr22	17178790	17221989	-	1.85	14.22	7.67e-39	3.88e-38	Up-regulated genes	protein_coding
CECR7	ENSG00000237438.6	chr22	17036570	17060825	+	-2.58	-22.36	1.69e-77	2.13e-76	Down-regulated genes	lncRNA
CELSR2	ENSG00000143126.7	chr1	109250019	109275750	+	3.46	29.38	2.07e-111	5.9e-110	Up-regulated genes	protein_coding
CENPU	ENSG00000151725.11	chr4	184694618	184734133	-	2.2	21.68	3.37e-74	3.94e-73	Up-regulated genes	protein_coding
CES1	ENSG00000198848.12	chr16	55802851	55833337	-	-3.29	-25.07	1.01e-90	1.75e-89	Down-regulated genes	protein_coding
CFD	ENSG00000197766.7	chr19	859643	863630	+	-2.21	-15.01	2.11e-42	1.17e-41	Down-regulated genes	protein_coding
CFH	ENSG00000000971.15	chr1	196651878	196747504	+	-3.77	-24.7	6.42e-89	1.06e-87	Down-regulated genes	protein_coding
CHAC1	ENSG00000128965.11	chr15	40952962	40956519	+	2.09	17.84	1.44e-55	1.09e-54	Up-regulated genes	protein_coding
CHCHD5	ENSG00000125611.15	chr2	112584240	112589275	+	1.48	20.55	1.16e-68	1.19e-67	Up-regulated genes	protein_coding
CHMP4C	ENSG00000164695.4	chr8	81732434	81759515	+	3.1	32.15	2.63e-124	1.02e-122	Up-regulated genes	protein_coding
CKM	ENSG00000104879.4	chr19	45306414	45322977	-	-1.48	-20.11	1.66e-66	1.62e-65	Down-regulated genes	protein_coding
CKMT1A	ENSG00000223572.9	chr15	43692886	43699222	+	2.73	17.93	5.38e-56	4.11e-55	Up-regulated genes	protein_coding
CLCN6	ENSG00000011021.21	chr1	11806096	11843144	+	-2.03	-21.87	4.26e-75	5.09e-74	Down-regulated genes	protein_coding
CLDN15	ENSG00000106404.13	chr7	101232092	101238820	-	-1.77	-17.72	5.11e-55	3.8e-54	Down-regulated genes	protein_coding
CLPS	ENSG00000137392.9	chr6	35794982	35797344	-	-1.93	-19.03	2.65e-61	2.28e-60	Down-regulated genes	protein_coding
CLPSL1	ENSG00000204140.9	chr6	35781017	35793675	+	1.14	9.15	1.44e-18	4.09e-18	Up-regulated genes	protein_coding
CLTCL1	ENSG00000070371.15	chr22	19179473	19291716	-	-1.5	-19.4	4.33e-63	3.88e-62	Down-regulated genes	protein_coding
CMAHP	ENSG00000168405.14	chr6	25081068	25166555	-	-2.98	-27.45	3.01e-102	6.88e-101	Down-regulated genes	others
CMB9-55F22.1	ENSG00000279672.1	chr11	779617	780755	+	-1.24	-14.14	1.69e-38	8.46e-38	Down-regulated genes	others
CNKSR1	ENSG00000142675.17	chr1	26177403	26189886	+	1.59	15.88	2.31e-46	1.4e-45	Up-regulated genes	protein_coding
COA6	ENSG00000168275.14	chr1	234373456	234384049	+	1.56	21.14	1.5e-71	1.64e-70	Up-regulated genes	protein_coding
COL6A4P2	ENSG00000228252.8	chr3	130212823	130273806	+	-3.12	-31.36	1.21e-120	4.32e-119	Down-regulated genes	others
COMP	ENSG00000105664.10	chr19	18782773	18791314	-	2.45	10.58	8.92e-24	2.97e-23	Up-regulated genes	protein_coding
CRELD1	ENSG00000163703.17	chr3	9933822	9945413	+	-1.06	-12.82	8.95e-33	3.82e-32	Down-regulated genes	protein_coding
CRIPAK	ENSG00000179979.8	chr4	1391552	1395989	+	-2.13	-26.45	2.15e-97	4.36e-96	Down-regulated genes	protein_coding
CRIPT	ENSG00000119878.5	chr2	46616416	46625742	+	1.12	16.42	6.99e-49	4.49e-48	Up-regulated genes	protein_coding
CRYBB2P1	ENSG00000100058.12	chr22	25448105	25520854	+	-1.44	-11.85	9.48e-29	3.63e-28	Down-regulated genes	lncRNA
CSPG4P12	ENSG00000259295.6	chr15	85191438	85213905	+	-2.89	-49.74	7.73e-197	2.13e-194	Down-regulated genes	lncRNA
CTC-490E21.11	ENSG00000279108.1	chr19	40840159	40842039	+	-1.47	-32.5	6.78e-126	2.75e-124	Down-regulated genes	others
CTD-2010I16.1	ENSG00000254595.1	chr11	6488186	6489377	-	-1.49	-36.72	1.02e-144	6.73e-143	Down-regulated genes	lncRNA
CTD-2012J19.2	ENSG00000248126.1	chr5	1598127	1598247	+	-1.51	-6.94	1.18e-11	2.61e-11	Down-regulated genes	lncRNA
CTD-2224J9.8	ENSG00000213777.5	chr19	53503392	53512687	+	-1.35	-39.29	9.57e-156	8.36e-154	Down-regulated genes	lncRNA
CTD-2248H3.1	ENSG00000248794.1	chr5	81242330	81242599	-	-1.24	-21.4	7.8e-73	8.82e-72	Down-regulated genes	lncRNA
CTGLF12P	ENSG00000265018.6	chr10	48009873	48031640	-	-1.58	-20	5.38e-66	5.15e-65	Down-regulated genes	lncRNA
CTSS	ENSG00000163131.10	chr1	150730196	150765957	-	2.06	12.19	3.78e-30	1.51e-29	Up-regulated genes	protein_coding
CTSW	ENSG00000172543.7	chr11	65879809	65883741	+	1.19	9.31	3.83e-19	1.11e-18	Up-regulated genes	protein_coding
CYBRD1	ENSG00000071967.11	chr2	171522247	171558133	+	-1.84	-14.52	3.38e-40	1.77e-39	Down-regulated genes	protein_coding
CYLD	ENSG00000083799.17	chr16	50742050	50801935	+	-1.12	-13.9	1.89e-37	9.2e-37	Down-regulated genes	protein_coding
CYP21A1P	ENSG00000204338.8	chr6	32005636	32008451	+	-1.61	-17.28	6.26e-53	4.41e-52	Down-regulated genes	lncRNA
CYP21A2	ENSG00000231852.6	chr6	32038265	32041670	+	-1.75	-17.13	3.39e-52	2.35e-51	Down-regulated genes	protein_coding
CYP4F11	ENSG00000171903.16	chr19	15912367	15934867	-	1.77	14.23	6.82e-39	3.45e-38	Up-regulated genes	protein_coding
CYP4F24P	ENSG00000267594.5	chr19	15760241	15779909	-	-1.09	-20.69	2.47e-69	2.56e-68	Down-regulated genes	lncRNA
CYP4F29P	ENSG00000228314.1	chr21	13843133	13848364	-	-1.71	-15.3	1.11e-43	6.34e-43	Down-regulated genes	lncRNA
CYP4V2	ENSG00000145476.15	chr4	186191520	186213456	+	-1.02	-10.75	2.09e-24	7.08e-24	Down-regulated genes	protein_coding
CYS1	ENSG00000205795.4	chr2	10056780	10080944	-	-1.66	-14.42	9.49e-40	4.9e-39	Down-regulated genes	protein_coding
D2HGDH	ENSG00000180902.16	chr2	241734579	241768816	+	-1.89	-18.97	5.15e-61	4.41e-60	Down-regulated genes	protein_coding
DBNDD1	ENSG00000003249.13	chr16	90004865	90020128	-	2.34	20.68	2.74e-69	2.84e-68	Up-regulated genes	protein_coding
DCAF16	ENSG00000163257.10	chr4	17800655	17810758	-	-1.32	-14.81	1.85e-41	9.99e-41	Down-regulated genes	protein_coding
DDIT4	ENSG00000168209.4	chr10	72273920	72276036	+	-3.69	-24.45	1.05e-87	1.68e-86	Down-regulated genes	protein_coding
DDTL	ENSG00000099974.7	chr22	23966901	23972532	+	-1.04	-12.69	3.07e-32	1.29e-31	Down-regulated genes	protein_coding
DDX55	ENSG00000111364.15	chr12	123602077	123620941	+	-1.16	-14.23	7.25e-39	3.67e-38	Down-regulated genes	protein_coding
DEFB109P3	ENSG00000254866.2	chr8	12150895	12151134	-	-1.45	-22.6	1.15e-78	1.51e-77	Down-regulated genes	lncRNA
DENND5B	ENSG00000170456.14	chr12	31382223	31591097	-	-1.65	-18.12	6.46e-57	5.04e-56	Down-regulated genes	protein_coding
DHFR	ENSG00000228716.6	chr5	80626228	80654983	-	1.58	16.89	4.76e-51	3.2e-50	Up-regulated genes	protein_coding
DHX58	ENSG00000108771.12	chr17	42101404	42112733	-	-1.53	-15.28	1.31e-43	7.5e-43	Down-regulated genes	protein_coding
DNAJB13	ENSG00000187726.8	chr11	73950319	73970366	+	3.04	18.11	7.01e-57	5.46e-56	Up-regulated genes	protein_coding
DNM1P51	ENSG00000235370.6	chr15	84398316	84411701	-	-1.21	-41.11	2.63e-163	2.86e-161	Down-regulated genes	lncRNA
DOCK10	ENSG00000135905.18	chr2	224765090	225042445	-	-2.61	-26.27	1.43e-96	2.84e-95	Down-regulated genes	protein_coding
DOCK6	ENSG00000130158.13	chr19	11199295	11262481	-	-1.44	-15.18	3.91e-43	2.2e-42	Down-regulated genes	protein_coding
DOK7	ENSG00000175920.15	chr4	3463311	3501473	+	3.44	24.18	2.16e-86	3.38e-85	Up-regulated genes	protein_coding
DPY19L2	ENSG00000177990.11	chr12	63558913	63668939	-	-3.96	-50.7	2.45e-200	7.39e-198	Down-regulated genes	protein_coding
DPYSL4	ENSG00000151640.12	chr10	132186900	132205776	+	-1.5	-14.07	3.57e-38	1.78e-37	Down-regulated genes	protein_coding
DRICH1	ENSG00000189269.12	chr22	23608452	23632321	-	-1.22	-33.77	1.17e-131	5.53e-130	Down-regulated genes	protein_coding
DTL	ENSG00000143476.17	chr1	212035553	212107400	+	2.36	24.97	2.97e-90	5.08e-89	Up-regulated genes	protein_coding
DUS3L	ENSG00000141994.15	chr19	5784832	5791238	-	-1.38	-17.24	9.71e-53	6.82e-52	Down-regulated genes	protein_coding
EFCAB13	ENSG00000178852.15	chr17	47323290	47441312	+	-1.24	-17.09	5.43e-52	3.75e-51	Down-regulated genes	protein_coding
EFHD1	ENSG00000115468.11	chr2	232606057	232682781	+	-2.73	-17.35	3.02e-53	2.15e-52	Down-regulated genes	protein_coding
EMX2	ENSG00000170370.11	chr10	117542444	117549546	+	1.81	10.42	3.7e-23	1.21e-22	Up-regulated genes	protein_coding
EP400	ENSG00000183495.13	chr12	131949920	132081102	+	-1.56	-17.55	3.33e-54	2.43e-53	Down-regulated genes	protein_coding
EP400NL	ENSG00000185684.12	chr12	132084283	132131639	+	-1.33	-17.14	2.91e-52	2.02e-51	Down-regulated genes	protein_coding
EPB41L3	ENSG00000082397.15	chr18	5392381	5630700	-	-2.14	-18.83	2.52e-60	2.12e-59	Down-regulated genes	protein_coding
EPHX2	ENSG00000120915.13	chr8	27490779	27545564	+	-1.77	-16.89	4.57e-51	3.08e-50	Down-regulated genes	protein_coding
EPHX4	ENSG00000172031.6	chr1	92029982	92063536	+	2.62	22.02	7.35e-76	8.95e-75	Up-regulated genes	protein_coding
ERICH6B	ENSG00000165837.11	chr13	45534522	45615739	-	-1.36	-40.51	7.66e-161	7.84e-159	Down-regulated genes	protein_coding
FAHD1	ENSG00000180185.11	chr16	1826941	1840207	+	1.02	13.62	3.4e-36	1.6e-35	Up-regulated genes	protein_coding
FAM103A2P	ENSG00000235272.1	chr6	166586124	166586477	-	2.31	22.5	3.36e-78	4.36e-77	Up-regulated genes	lncRNA
FAM106A	ENSG00000213077.5	chr17	18524566	18526846	-	-1.06	-34.83	2.03e-136	1.09e-134	Down-regulated genes	protein_coding
FAM183A	ENSG00000186973.10	chr1	43145153	43156396	+	1.8	9.2	9.53e-19	2.72e-18	Up-regulated genes	protein_coding
FAM198A	ENSG00000144649.8	chr3	42979267	43060211	+	-2.13	-22.7	3.5e-79	4.65e-78	Down-regulated genes	protein_coding
FAM198B	ENSG00000164125.15	chr4	158124474	158173318	-	-3.27	-27.88	2.92e-104	6.98e-103	Down-regulated genes	protein_coding
FAM228B	ENSG00000219626.8	chr2	24076526	24169640	+	-1.85	-22.77	1.72e-79	2.29e-78	Down-regulated genes	protein_coding
FAM72C	ENSG00000263513.5	chr1	143944179	143971965	-	1.17	14.58	1.94e-40	1.02e-39	Up-regulated genes	protein_coding
FAM86B3P	ENSG00000173295.7	chr8	8228595	8244865	+	-1.4	-15.98	8.32e-47	5.1e-46	Down-regulated genes	lncRNA
FCER1G	ENSG00000158869.10	chr1	161215234	161220699	+	2.83	18.29	1.04e-57	8.22e-57	Up-regulated genes	protein_coding
FKBP1A	ENSG00000088832.14	chr20	1368978	1393172	-	1.05	12.84	7.58e-33	3.25e-32	Up-regulated genes	protein_coding
FLYWCH1	ENSG00000059122.16	chr16	2911937	2951208	+	-1.95	-26.31	9.47e-97	1.88e-95	Down-regulated genes	protein_coding
FMO1	ENSG00000010932.15	chr1	171248471	171285978	+	-1.11	-8.37	5.52e-16	1.43e-15	Down-regulated genes	protein_coding
FMO2	ENSG00000094963.13	chr1	171185208	171212683	+	-1.02	-8.27	1.17e-15	3e-15	Down-regulated genes	protein_coding
FNIP1	ENSG00000217128.11	chr5	131641714	131797063	-	-1.39	-22.28	4.14e-77	5.2e-76	Down-regulated genes	protein_coding
FRAT2	ENSG00000181274.6	chr10	97332497	97334709	-	2.15	27.65	3.57e-103	8.34e-102	Up-regulated genes	protein_coding
FRMD6	ENSG00000139926.15	chr14	51489100	51730727	+	-1.71	-16.35	1.56e-48	9.98e-48	Down-regulated genes	protein_coding
FTCDNL1	ENSG00000226124.6	chr2	199760544	199851173	-	1.57	18.93	8.72e-61	7.42e-60	Up-regulated genes	protein_coding
FTLP14	ENSG00000260459.2	chr16	68822587	68823070	+	1.03	13.2	2.2e-34	9.85e-34	Up-regulated genes	lncRNA
FUT2	ENSG00000176920.11	chr19	48695971	48705950	+	1.52	10.87	7.31e-25	2.51e-24	Up-regulated genes	protein_coding
FXYD4	ENSG00000150201.14	chr10	43371642	43376335	+	1.39	8.15	2.93e-15	7.43e-15	Up-regulated genes	protein_coding
FYCO1	ENSG00000163820.14	chr3	45917899	45995824	-	-1.57	-20.21	4.98e-67	4.9e-66	Down-regulated genes	protein_coding
FZD6	ENSG00000164930.11	chr8	103298433	103332866	+	1.2	12.2	3.59e-30	1.43e-29	Up-regulated genes	protein_coding
GABPB1-AS1	ENSG00000244879.4	chr15	50354959	50372202	+	-1.38	-15.35	6.46e-44	3.71e-43	Down-regulated genes	lncRNA
GATA3	ENSG00000107485.15	chr10	8053604	8075198	+	1.01	10.04	9.2e-22	2.89e-21	Up-regulated genes	protein_coding
GBP2	ENSG00000162645.12	chr1	89106132	89150456	-	-1.66	-12.39	5.87e-31	2.39e-30	Down-regulated genes	protein_coding
GBP5	ENSG00000154451.14	chr1	89258950	89272804	-	1.33	9.14	1.56e-18	4.43e-18	Up-regulated genes	protein_coding
GLIPR1L2	ENSG00000180481.10	chr12	75391070	75432688	+	-1.11	-19.89	1.83e-65	1.74e-64	Down-regulated genes	protein_coding
GOLGA6L10	ENSG00000278662.4	chr15	82339998	82349475	-	-1.4	-18.96	6.05e-61	5.18e-60	Down-regulated genes	protein_coding
GOLGA6L3	ENSG00000188388.10	chr15	85240472	85247170	+	-1.42	-41.56	3.62e-165	4.11e-163	Down-regulated genes	lncRNA
GOLGA6L4	ENSG00000184206.11	chr15	84235773	84245368	+	-3.34	-56.81	1.39e-221	7.51e-219	Down-regulated genes	protein_coding
GOLGA6L5P	ENSG00000230373.8	chr15	84507885	84516814	-	-4.43	-50.25	1.08e-198	3.08e-196	Down-regulated genes	lncRNA
GOLGA6L9	ENSG00000197978.9	chr15	82430018	82439153	+	-1.31	-14.37	1.61e-39	8.26e-39	Down-regulated genes	protein_coding
GOLGA8B	ENSG00000215252.11	chr15	34525207	34588503	-	-3.92	-29.86	1.22e-113	3.67e-112	Down-regulated genes	protein_coding
GOLGA8Q	ENSG00000178115.11	chr15	30552078	30562501	+	-1.74	-48.24	2.85e-191	6.13e-189	Down-regulated genes	protein_coding
GPX7	ENSG00000116157.5	chr1	52602372	52609051	+	1.3	12.13	6.56e-30	2.59e-29	Up-regulated genes	protein_coding
GS1-124K5.2	ENSG00000230189.6	chr7	66409143	66490059	-	-1.19	-17.17	2.12e-52	1.48e-51	Down-regulated genes	lncRNA
GSTA1	ENSG00000243955.5	chr6	52791664	52803910	-	-2.31	-10.64	5.54e-24	1.86e-23	Down-regulated genes	protein_coding
GSTM1	ENSG00000134184.12	chr1	109687814	109709039	+	-1.47	-3.85	0.00013252	0.000201737	Down-regulated genes	protein_coding
GSTM3	ENSG00000134202.10	chr1	109733932	109741038	-	-3.28	-21.4	7.94e-73	8.97e-72	Down-regulated genes	protein_coding
GSTM5	ENSG00000134201.10	chr1	109712255	109775428	+	-6.06	-61.66	2.61e-237	2.16e-234	Down-regulated genes	protein_coding
GSTT2B	ENSG00000133433.10	chr22	23957414	23961186	-	-2.02	-13.47	1.52e-35	7e-35	Down-regulated genes	protein_coding
GTF2IP1	ENSG00000277053.4	chr7	75185385	75237696	-	-1	-11.88	7.03e-29	2.7e-28	Down-regulated genes	lncRNA
GTF2IRD2	ENSG00000196275.13	chr7	74796144	74851551	-	-1.62	-21.09	2.78e-71	3.01e-70	Down-regulated genes	protein_coding
GUSBP9	ENSG00000215630.6	chr5	71197646	71208130	-	-1.43	-14.04	5e-38	2.48e-37	Down-regulated genes	lncRNA
H3F3A	ENSG00000163041.9	chr1	226061851	226072001	+	1.2	15.18	3.85e-43	2.17e-42	Up-regulated genes	protein_coding
HAAO	ENSG00000162882.14	chr2	42767089	42792593	-	-2.65	-31.8	1.11e-122	4.17e-121	Down-regulated genes	protein_coding
HCG27	ENSG00000206344.6	chr6	31197760	31203968	+	-1.23	-17.94	4.88e-56	3.73e-55	Down-regulated genes	protein_coding
HCG4B	ENSG00000227262.3	chr6	29925983	29926973	-	-1.17	-18.17	3.81e-57	2.98e-56	Down-regulated genes	lncRNA
HCG4P3	ENSG00000237669.1	chr6	30006121	30007116	-	-1.17	-23.73	3.4e-84	5.08e-83	Down-regulated genes	lncRNA
HERC2P9	ENSG00000206149.10	chr15	28589492	28685264	+	-2.68	-27.5	1.74e-102	3.99e-101	Down-regulated genes	lncRNA
HGSNAT	ENSG00000165102.14	chr8	43140455	43202855	+	-1.29	-13.32	6.69e-35	3.04e-34	Down-regulated genes	protein_coding
HIST1H4J	ENSG00000197238.4	chr6	27824108	27824480	+	1.63	13.7	1.48e-36	7.03e-36	Up-regulated genes	protein_coding
HLA-B	ENSG00000234745.9	chr6	31353872	31357188	-	1.28	8.34	7.3e-16	1.89e-15	Up-regulated genes	protein_coding
HLA-C	ENSG00000204525.14	chr6	31268749	31357158	-	1.06	7.43	4.67e-13	1.09e-12	Up-regulated genes	protein_coding
HLA-DPA1	ENSG00000231389.7	chr6	33064569	33080775	-	3.13	16.08	2.69e-47	1.67e-46	Up-regulated genes	protein_coding
HLA-DQA1	ENSG00000196735.11	chr6	32628179	32647062	+	3.09	13.3	8.41e-35	3.81e-34	Up-regulated genes	protein_coding
HLA-DQA2	ENSG00000237541.3	chr6	32741342	32747215	+	1.95	10.04	9.33e-22	2.93e-21	Up-regulated genes	protein_coding
HLA-DQB1	ENSG00000179344.16	chr6	32659467	32668383	-	2.9	12.9	4.32e-33	1.86e-32	Up-regulated genes	protein_coding
HLA-DQB2	ENSG00000232629.8	chr6	32756098	32763534	-	2.27	12.71	2.71e-32	1.15e-31	Up-regulated genes	protein_coding
HLA-DRB1	ENSG00000196126.10	chr6	32552990	32589848	-	2.89	15.85	3.29e-46	2e-45	Up-regulated genes	protein_coding
HLA-DRB5	ENSG00000198502.5	chr6	32517343	32530287	-	2.32	8.83	1.7e-17	4.65e-17	Up-regulated genes	protein_coding
HLA-DRB6	ENSG00000229391.7	chr6	32552713	32560022	-	1.16	7.26	1.5e-12	3.44e-12	Up-regulated genes	lncRNA
HLA-K	ENSG00000230795.2	chr6	29926459	29929232	+	-1.73	-21.03	5.57e-71	5.99e-70	Down-regulated genes	lncRNA
HMBOX1	ENSG00000147421.17	chr8	28890394	29064764	+	-1.73	-20.86	3.42e-70	3.62e-69	Down-regulated genes	protein_coding
HMBS	ENSG00000256269.6	chr11	119084866	119093549	+	1.55	19.58	6.06e-64	5.54e-63	Up-regulated genes	protein_coding
HNRNPH3	ENSG00000096746.17	chr10	68331174	68343191	+	-1.33	-14.92	5.81e-42	3.19e-41	Down-regulated genes	protein_coding
HOXB4	ENSG00000182742.5	chr17	48575513	48580111	-	2.39	17.6	2e-54	1.46e-53	Up-regulated genes	protein_coding
HP	ENSG00000257017.8	chr16	72054592	72061055	+	1.89	6.11	2.01e-09	4.02e-09	Up-regulated genes	protein_coding
HPDL	ENSG00000186603.5	chr1	45326905	45328533	+	1.72	17.19	1.83e-52	1.27e-51	Up-regulated genes	protein_coding
HSD3B7	ENSG00000099377.13	chr16	30985207	30989152	+	1.17	11.49	2.56e-27	9.42e-27	Up-regulated genes	protein_coding
HSPA12B	ENSG00000132622.10	chr20	3732667	3753111	+	-1.95	-24.11	4.71e-86	7.29e-85	Down-regulated genes	protein_coding
HYAL3	ENSG00000186792.15	chr3	50292828	50299468	-	1.45	16.34	1.7e-48	1.08e-47	Up-regulated genes	protein_coding
IFI27L2	ENSG00000119632.3	chr14	94127779	94130253	-	-1.11	-11.08	1.04e-25	3.67e-25	Down-regulated genes	protein_coding
IGHMBP2	ENSG00000132740.8	chr11	68903842	68940602	+	-1.39	-18.98	4.64e-61	3.98e-60	Down-regulated genes	protein_coding
IGKV1-12	ENSG00000243290.1	chr2	89040224	89040745	-	1.37	5.94	5.27e-09	1.03e-08	Up-regulated genes	others
IGKV1D-39	ENSG00000251546.1	chr2	89862482	89862981	+	2.47	6.27	7.98e-10	1.63e-09	Up-regulated genes	others
IGLC3	ENSG00000211679.2	chr22	22906342	22906803	+	2.84	7.14	3.38e-12	7.63e-12	Up-regulated genes	others
IGLV1-44	ENSG00000211651.3	chr22	22380766	22381347	+	1.78	5.64	2.8e-08	5.31e-08	Up-regulated genes	others
IGLV2-14	ENSG00000211666.2	chr22	22758700	22759218	+	1.93	5.44	8.51e-08	1.57e-07	Up-regulated genes	others
IGLV3-10	ENSG00000211669.2	chr22	22811747	22812285	+	1.51	5.36	1.29e-07	2.36e-07	Up-regulated genes	others
IL11RA	ENSG00000137070.17	chr9	34650702	34661892	+	-2.53	-17.81	2.06e-55	1.55e-54	Down-regulated genes	protein_coding
INHA	ENSG00000123999.4	chr2	219569162	219575713	+	-4.83	-38.61	7.56e-153	6.26e-151	Down-regulated genes	protein_coding
IQCG	ENSG00000114473.13	chr3	197889075	197960142	-	-1.98	-17.23	1.08e-52	7.57e-52	Down-regulated genes	protein_coding
IRF5	ENSG00000128604.18	chr7	128937612	128950035	+	1.86	18.4	2.99e-58	2.4e-57	Up-regulated genes	protein_coding
ITGA10	ENSG00000143127.12	chr1	145891208	145910189	-	-1.91	-31.89	4.04e-123	1.53e-121	Down-regulated genes	protein_coding
ITIH4	ENSG00000055955.15	chr3	52812975	52831479	-	-1.47	-16.9	3.89e-51	2.62e-50	Down-regulated genes	protein_coding
ITLN2	ENSG00000158764.6	chr1	160945025	160954799	-	-1.75	-32.32	4.46e-125	1.77e-123	Down-regulated genes	protein_coding
KB-1269D1.8	ENSG00000248409.1	chr22	23392771	23393839	+	-1.93	-30.7	1.33e-117	4.44e-116	Down-regulated genes	lncRNA
KCNA5	ENSG00000130037.4	chr12	5043989	5046788	+	-1.08	-15.48	1.58e-44	9.17e-44	Down-regulated genes	protein_coding
KIF16B	ENSG00000089177.17	chr20	16272104	16573433	-	-1.32	-18.66	1.65e-59	1.37e-58	Down-regulated genes	protein_coding
KLHDC1	ENSG00000197776.7	chr14	49693105	49753152	+	-2.39	-46.61	3.84e-185	7.38e-183	Down-regulated genes	protein_coding
KRT1	ENSG00000167768.4	chr12	52674736	52680407	-	-1.46	-19.28	1.73e-62	1.53e-61	Down-regulated genes	protein_coding
KRTCAP2	ENSG00000163463.11	chr1	155169408	155173475	-	1.08	13.24	1.43e-34	6.44e-34	Up-regulated genes	protein_coding
KSR1	ENSG00000141068.13	chr17	27456714	27626438	+	-2.86	-23.64	9.18e-84	1.35e-82	Down-regulated genes	protein_coding
L3HYPDH	ENSG00000126790.11	chr14	59460363	59484430	-	-2.34	-27.77	8.95e-104	2.12e-102	Down-regulated genes	protein_coding
LAT2	ENSG00000086730.16	chr7	74199652	74229834	+	1.11	9.85	4.51e-21	1.39e-20	Up-regulated genes	protein_coding
LDB2	ENSG00000169744.12	chr4	16501541	16898809	-	-1.97	-21.21	6.66e-72	7.37e-71	Down-regulated genes	protein_coding
LEMD3	ENSG00000174106.2	chr12	65169571	65248327	+	-1.01	-14.19	1.05e-38	5.3e-38	Down-regulated genes	protein_coding
LGALS2	ENSG00000100079.6	chr22	37570246	37582616	-	1	10.58	9.12e-24	3.04e-23	Up-regulated genes	protein_coding
LHPP	ENSG00000107902.13	chr10	124461834	124617888	+	1.14	13.37	3.89e-35	1.78e-34	Up-regulated genes	protein_coding
LILRB4	ENSG00000186818.12	chr19	54643889	54670359	+	2.36	15.82	4.5e-46	2.72e-45	Up-regulated genes	protein_coding
LIMA1	ENSG00000050405.13	chr12	50175788	50283546	-	-1.91	-20.42	4.78e-68	4.81e-67	Down-regulated genes	protein_coding
LINC00115	ENSG00000225880.5	chr1	826206	827522	-	-2.26	-39.89	3.05e-158	2.87e-156	Down-regulated genes	lncRNA
LINC00174	ENSG00000179406.6	chr7	66376044	66401338	-	-1.39	-15.12	6.71e-43	3.76e-42	Down-regulated genes	lncRNA
LINC00921	ENSG00000281005.1	chr16	3263743	3267567	+	-1.2	-25.84	1.88e-94	3.54e-93	Down-regulated genes	lncRNA
LRRC25	ENSG00000175489.9	chr19	18391144	18397617	-	1.09	10.36	6.44e-23	2.09e-22	Up-regulated genes	protein_coding
LRRC37A2	ENSG00000238083.7	chr17	46511511	46555650	+	-1.55	-15.66	2.42e-45	1.44e-44	Down-regulated genes	protein_coding
LRRK2	ENSG00000188906.13	chr12	40196744	40369285	+	-2.4	-45.34	3.28e-180	5.54e-178	Down-regulated genes	protein_coding
LURAP1	ENSG00000171357.5	chr1	46203334	46221261	+	-1.66	-29.36	2.66e-111	7.53e-110	Down-regulated genes	protein_coding
LY75	ENSG00000054219.10	chr2	159803355	159904749	-	2.1	20.72	1.75e-69	1.82e-68	Up-regulated genes	protein_coding
LYPD2	ENSG00000197353.3	chr8	142750150	142752534	-	3.15	10.65	4.78e-24	1.61e-23	Up-regulated genes	protein_coding
LYPD5	ENSG00000159871.14	chr19	43795929	43827206	-	1.02	11.99	2.48e-29	9.66e-29	Up-regulated genes	protein_coding
LYRM9	ENSG00000232859.9	chr17	27878314	27894752	-	-2.18	-27.11	1.31e-100	2.89e-99	Down-regulated genes	protein_coding
LYZ	ENSG00000090382.6	chr12	69348341	69354234	+	2.62	12.44	3.55e-31	1.45e-30	Up-regulated genes	protein_coding
MAP3K7CL	ENSG00000156265.15	chr21	29077471	29175889	+	-1	-13.66	2.33e-36	1.1e-35	Down-regulated genes	protein_coding
MASP2	ENSG00000009724.16	chr1	11026523	11047233	-	-1.32	-24.34	3.45e-87	5.51e-86	Down-regulated genes	protein_coding
MCOLN2	ENSG00000153898.12	chr1	84925583	84997113	-	1.07	11.63	7e-28	2.62e-27	Up-regulated genes	protein_coding
MDGA1	ENSG00000112139.14	chr6	37630679	37699306	-	-2.31	-27.74	1.29e-103	3.04e-102	Down-regulated genes	protein_coding
MFAP5	ENSG00000197614.10	chr12	8637346	8662888	-	3.3	14.85	1.16e-41	6.31e-41	Up-regulated genes	protein_coding
MGARP	ENSG00000137463.4	chr4	139266163	139280338	-	-2.84	-30.07	1.26e-114	3.89e-113	Down-regulated genes	protein_coding
MIB2	ENSG00000197530.12	chr1	1615415	1630610	+	-2.1	-23.15	2.41e-81	3.36e-80	Down-regulated genes	protein_coding
MICA	ENSG00000204520.12	chr6	31399784	31415315	+	-2.24	-23.11	3.57e-81	4.95e-80	Down-regulated genes	protein_coding
MICB	ENSG00000204516.9	chr6	31494881	31511124	+	1.39	11.72	3.11e-28	1.18e-27	Up-regulated genes	protein_coding
MIF	ENSG00000240972.1	chr22	23894004	23895227	+	2.33	23.48	5.61e-83	8.1e-82	Up-regulated genes	protein_coding
MIF-AS1	ENSG00000218537.1	chr22	23894426	23898930	-	1.21	15.1	8.54e-43	4.78e-42	Up-regulated genes	lncRNA
MIR22HG	ENSG00000186594.12	chr17	1711493	1717174	-	-1.67	-13.04	1.09e-33	4.8e-33	Down-regulated genes	lncRNA
MLLT6	ENSG00000275023.4	chr17	38705542	38729803	+	-2.39	-20.64	4.15e-69	4.27e-68	Down-regulated genes	protein_coding
MMP23A	ENSG00000215914.4	chr1	1699942	1701782	+	-2.35	-16.82	1.01e-50	6.73e-50	Down-regulated genes	lncRNA
MMP24	ENSG00000125966.9	chr20	35226654	35277000	+	1.27	11.15	5.86e-26	2.07e-25	Up-regulated genes	protein_coding
MMRN1	ENSG00000138722.9	chr4	89879532	89954629	+	-1.65	-18.55	5.56e-59	4.54e-58	Down-regulated genes	protein_coding
MNDA	ENSG00000163563.7	chr1	158831317	158849506	+	1.17	10.17	3.06e-22	9.73e-22	Up-regulated genes	protein_coding
MPP3	ENSG00000161647.18	chr17	43800799	43833170	-	-1.01	-11.99	2.64e-29	1.03e-28	Down-regulated genes	protein_coding
MSRB3	ENSG00000174099.10	chr12	65278643	65488244	+	-1.78	-15.97	8.73e-47	5.35e-46	Down-regulated genes	protein_coding
MT1E	ENSG00000169715.14	chr16	56625475	56627112	+	1.23	5.65	2.68e-08	5.08e-08	Up-regulated genes	protein_coding
MTND1P23	ENSG00000225972.1	chr1	629062	629433	+	1.03	3.82	0.000148237	0.000224806	Up-regulated genes	lncRNA
MUT	ENSG00000146085.7	chr6	49430360	49463191	-	-1.12	-15.5	1.25e-44	7.28e-44	Down-regulated genes	protein_coding
MYL2	ENSG00000111245.14	chr12	110910819	110920722	-	-1.64	-26.5	1.21e-97	2.46e-96	Down-regulated genes	protein_coding
MYOM2	ENSG00000036448.9	chr8	2045040	2165552	+	-1.48	-17.46	8.9e-54	6.42e-53	Down-regulated genes	protein_coding
NAPSB	ENSG00000131401.11	chr19	50333796	50344767	-	1.41	11.93	4.55e-29	1.76e-28	Up-regulated genes	lncRNA
NCKIPSD	ENSG00000213672.7	chr3	48673844	48686364	-	-1.01	-12.14	6.07e-30	2.4e-29	Down-regulated genes	protein_coding
NDC80	ENSG00000080986.12	chr18	2571511	2616635	+	2.53	23.98	1.92e-85	2.94e-84	Up-regulated genes	protein_coding
NDUFAF4P3	ENSG00000236411.1	chr3	37789921	37790445	-	-1.09	-24.49	6.37e-88	1.03e-86	Down-regulated genes	lncRNA
NECAB3	ENSG00000125967.16	chr20	33657087	33674463	-	-1.22	-12.66	4.38e-32	1.84e-31	Down-regulated genes	protein_coding
NFASC	ENSG00000163531.15	chr1	204828651	205022822	+	-2.89	-25.6	2.77e-93	5.09e-92	Down-regulated genes	protein_coding
NIPAL1	ENSG00000163293.11	chr4	47914142	48040173	+	1.13	16.13	1.55e-47	9.65e-47	Up-regulated genes	protein_coding
NLRP2	ENSG00000022556.15	chr19	54953130	55001142	+	2.27	9.08	2.49e-18	7.02e-18	Up-regulated genes	protein_coding
NMI	ENSG00000123609.10	chr2	151270465	151290057	-	1.51	17.7	6.93e-55	5.13e-54	Up-regulated genes	protein_coding
NMRK1	ENSG00000106733.20	chr9	75060573	75088217	-	-1.37	-16.54	2.01e-49	1.31e-48	Down-regulated genes	protein_coding
NOSTRIN	ENSG00000163072.14	chr2	168786539	168865514	+	-2.74	-37.26	4.55e-147	3.24e-145	Down-regulated genes	protein_coding
NPHP3	ENSG00000113971.18	chr3	132680609	132722442	-	-3.33	-42.53	4.1e-169	5.17e-167	Down-regulated genes	protein_coding
NPIPA1	ENSG00000183426.15	chr16	14750813	14952060	+	-3.16	-28.09	2.63e-105	6.44e-104	Down-regulated genes	protein_coding
NPIPA5	ENSG00000183793.13	chr16	15363624	15381047	-	-2.84	-15.93	1.38e-46	8.39e-46	Down-regulated genes	protein_coding
NPIPB9	ENSG00000196993.8	chr16	28751787	28772807	+	-1.17	-18.31	8.25e-58	6.56e-57	Down-regulated genes	protein_coding
NPIPP1	ENSG00000188599.17	chr16	15104312	15123498	-	-2.58	-27.02	3.86e-100	8.4e-99	Down-regulated genes	lncRNA
NPPA	ENSG00000175206.10	chr1	11845709	11848345	-	-1.68	-24.14	3.36e-86	5.23e-85	Down-regulated genes	protein_coding
NPPA-AS1	ENSG00000242349.5	chr1	11841017	11848079	+	-1.39	-23.19	1.5e-81	2.11e-80	Down-regulated genes	lncRNA
NSMAF	ENSG00000035681.7	chr8	58583504	58659844	-	-1.09	-14.45	7.3e-40	3.79e-39	Down-regulated genes	protein_coding
NSUN5P2	ENSG00000106133.17	chr7	72947581	72954790	-	-1.08	-11.6	9.68e-28	3.61e-27	Down-regulated genes	lncRNA
NSUN6	ENSG00000241058.3	chr10	18545561	18659285	-	-1.55	-22.57	1.5e-78	1.96e-77	Down-regulated genes	protein_coding
NTN5	ENSG00000142233.11	chr19	48661407	48673081	-	-1.54	-22.64	7.13e-79	9.38e-78	Down-regulated genes	protein_coding
NUF2	ENSG00000143228.12	chr1	163266576	163355764	+	2.66	26.22	2.62e-96	5.14e-95	Up-regulated genes	protein_coding
NUS1P2	ENSG00000234685.1	chr13	22915651	22916523	+	2	12.88	5.13e-33	2.21e-32	Up-regulated genes	lncRNA
OASL	ENSG00000135114.12	chr12	121019111	121039242	-	2.64	17.29	5.77e-53	4.08e-52	Up-regulated genes	protein_coding
OBSL1	ENSG00000124006.14	chr2	219550729	219571859	-	-3.1	-26.23	2.48e-96	4.87e-95	Down-regulated genes	protein_coding
ODF2L	ENSG00000122417.15	chr1	86346824	86396342	-	-1.38	-17.02	1.15e-51	7.86e-51	Down-regulated genes	protein_coding
OR2A20P	ENSG00000170356.8	chr7	144250045	144252957	-	-2.02	-18.99	4.2e-61	3.61e-60	Down-regulated genes	lncRNA
OR2A9P	ENSG00000228960.5	chr7	144294480	144300934	+	-1.64	-17.74	4.16e-55	3.11e-54	Down-regulated genes	lncRNA
OR52N4	ENSG00000181074.3	chr11	5754693	5755729	+	-1.18	-39.35	5.53e-156	4.89e-154	Down-regulated genes	protein_coding
OR7E38P	ENSG00000183444.10	chr7	97966090	97967074	-	1.41	13.4	3.08e-35	1.41e-34	Up-regulated genes	lncRNA
OXCT2P1	ENSG00000237624.1	chr1	39514956	39516490	+	-2.2	-34.63	1.66e-135	8.65e-134	Down-regulated genes	lncRNA
OXER1	ENSG00000162881.6	chr2	42762481	42764261	-	-2.63	-47.19	2.48e-187	4.94e-185	Down-regulated genes	protein_coding
PAM	ENSG00000145730.20	chr5	102753981	103031105	+	-1.25	-9.79	7.61e-21	2.33e-20	Down-regulated genes	protein_coding
PBX3	ENSG00000167081.16	chr9	125747345	125967377	+	-3.2	-29.82	1.85e-113	5.53e-112	Down-regulated genes	protein_coding
PCCB	ENSG00000114054.13	chr3	136250306	136337896	+	1.54	19.35	7.42e-63	6.61e-62	Up-regulated genes	protein_coding
PDE8B	ENSG00000113231.13	chr5	77210449	77429807	+	-1.43	-21.89	3.36e-75	4.02e-74	Down-regulated genes	protein_coding
PDF	ENSG00000258429.1	chr16	69328621	69330595	-	1.38	17.72	5.57e-55	4.14e-54	Up-regulated genes	protein_coding
PERP	ENSG00000112378.11	chr6	138088505	138107511	-	2.64	22.5	3.6e-78	4.66e-77	Up-regulated genes	protein_coding
PILRB	ENSG00000121716.18	chr7	100352176	100367733	+	-2.17	-17.1	4.76e-52	3.29e-51	Down-regulated genes	protein_coding
PIWIL4	ENSG00000134627.11	chr11	94543840	94621421	+	-1.34	-24.61	1.74e-88	2.85e-87	Down-regulated genes	protein_coding
PJA2	ENSG00000198961.9	chr5	109334709	109409994	-	-1.49	-19.61	4.41e-64	4.05e-63	Down-regulated genes	protein_coding
PKIB	ENSG00000135549.14	chr6	122471917	122726373	+	1.85	17.46	9.22e-54	6.64e-53	Up-regulated genes	protein_coding
PLA2G4B	ENSG00000243708.8	chr15	41837775	41848147	+	-2.57	-25.38	3.03e-92	5.45e-91	Down-regulated genes	protein_coding
PLA2R1	ENSG00000153246.11	chr2	159932006	160062610	-	-2.55	-34.49	6.45e-135	3.32e-133	Down-regulated genes	protein_coding
PLEKHB1	ENSG00000021300.13	chr11	73646178	73662819	+	3.1	22.34	2.21e-77	2.79e-76	Up-regulated genes	protein_coding
PLGLB1	ENSG00000183281.14	chr2	87002559	87021852	-	-1.57	-21.2	8.09e-72	8.93e-71	Down-regulated genes	protein_coding
PMS2P3	ENSG00000127957.16	chr7	75502930	75528148	-	-1.08	-15.13	6.58e-43	3.69e-42	Down-regulated genes	lncRNA
PNLIP	ENSG00000175535.6	chr10	116545931	116567855	+	-1.52	-30.07	1.18e-114	3.65e-113	Down-regulated genes	protein_coding
POLI	ENSG00000101751.10	chr18	54269404	54321266	+	-2.53	-33.75	1.41e-131	6.65e-130	Down-regulated genes	protein_coding
POMC	ENSG00000115138.10	chr2	25160853	25168903	-	-1.44	-13.77	7.1e-37	3.41e-36	Down-regulated genes	protein_coding
POU2F3	ENSG00000137709.9	chr11	120236640	120319944	+	3.2	19.75	8.57e-65	8.01e-64	Up-regulated genes	protein_coding
POU5F1	ENSG00000204531.15	chr6	31164337	31180731	-	1.72	12.7	2.98e-32	1.25e-31	Up-regulated genes	protein_coding
PPFIA2	ENSG00000139220.16	chr12	81257975	81759553	-	-1.05	-19.87	2.38e-65	2.25e-64	Down-regulated genes	protein_coding
PPP2CB	ENSG00000104695.12	chr8	30774457	30814314	-	-1.18	-14.19	9.95e-39	5.01e-38	Down-regulated genes	protein_coding
PRPH2	ENSG00000112619.7	chr6	42696600	42722574	-	-1.45	-29	1.31e-109	3.56e-108	Down-regulated genes	protein_coding
PRPS1P2	ENSG00000232630.1	chr9	125150653	125151589	+	-1.24	-20.06	2.67e-66	2.58e-65	Down-regulated genes	lncRNA
PRRT1	ENSG00000204314.10	chr6	32148359	32154373	-	-2.79	-26.04	1.89e-95	3.65e-94	Down-regulated genes	protein_coding
PSCA	ENSG00000167653.4	chr8	142670308	142682724	+	1.36	7.96	1.1e-14	2.74e-14	Up-regulated genes	protein_coding
PSMB9	ENSG00000240065.7	chr6	32844136	32859585	+	1.89	12.55	1.26e-31	5.21e-31	Up-regulated genes	protein_coding
PSORS1C3	ENSG00000204528.3	chr6	31173735	31177899	-	1.13	8.27	1.21e-15	3.1e-15	Up-regulated genes	others
PTAFR	ENSG00000169403.11	chr1	28147166	28193936	-	1.94	16.46	4.85e-49	3.13e-48	Up-regulated genes	protein_coding
PTER	ENSG00000165983.14	chr10	16436943	16513745	+	1.31	17.06	7.45e-52	5.13e-51	Up-regulated genes	protein_coding
PTPRB	ENSG00000127329.14	chr12	70515866	70637440	-	-1.24	-19.96	8.34e-66	7.96e-65	Down-regulated genes	protein_coding
PTPRD	ENSG00000153707.15	chr9	8314246	10612723	-	-3.38	-34.22	1.1e-133	5.52e-132	Down-regulated genes	protein_coding
PYROXD2	ENSG00000119943.10	chr10	98383565	98415184	-	-1.63	-18.14	5.07e-57	3.97e-56	Down-regulated genes	protein_coding
QTRT1	ENSG00000213339.8	chr19	10701430	10713437	+	-1.32	-13.76	7.88e-37	3.77e-36	Down-regulated genes	protein_coding
RAC2	ENSG00000128340.14	chr22	37225261	37244448	-	1.51	11.58	1.18e-27	4.4e-27	Up-regulated genes	protein_coding
RDM1	ENSG00000278023.4	chr17	35918066	35930773	-	1.41	19.6	4.98e-64	4.56e-63	Up-regulated genes	protein_coding
REG1B	ENSG00000172023.7	chr2	79085030	79088019	-	-1.38	-27.68	2.4e-103	5.62e-102	Down-regulated genes	protein_coding
RFPL3S	ENSG00000205853.10	chr22	32359906	32382052	-	-1.25	-22.87	5.6e-80	7.55e-79	Down-regulated genes	protein_coding
RGPD2	ENSG00000185304.13	chr2	87755955	87825952	-	-1.14	-13.75	9.19e-37	4.39e-36	Down-regulated genes	protein_coding
RGPD8	ENSG00000169629.11	chr2	112370092	112434488	-	-1.26	-29.99	2.99e-114	9.08e-113	Down-regulated genes	protein_coding
RIC3	ENSG00000166405.14	chr11	8106093	8169055	-	-3.11	-20.16	8.79e-67	8.61e-66	Down-regulated genes	protein_coding
RNF166	ENSG00000158717.10	chr16	88696495	88706421	-	-1.11	-15.52	1.01e-44	5.89e-44	Down-regulated genes	protein_coding
RNF2	ENSG00000121481.10	chr1	185045364	185102608	+	1.33	15.04	1.68e-42	9.31e-42	Up-regulated genes	protein_coding
RNF24	ENSG00000101236.16	chr20	3927309	4015582	-	1.2	13.12	4.79e-34	2.13e-33	Up-regulated genes	protein_coding
RNU11	ENSG00000270103.3	chr1	28648600	28648730	+	4.74	22.11	2.78e-76	3.42e-75	Up-regulated genes	lncRNA
RP1-228P16.1	ENSG00000240399.1	chr12	48054813	48055591	-	-1.15	-22.75	2.05e-79	2.74e-78	Down-regulated genes	lncRNA
RP11-1415C14.4	ENSG00000254701.3	chr5	70197255	70207745	-	-1.35	-15.58	5.38e-45	3.16e-44	Down-regulated genes	lncRNA
RP11-175B9.3	ENSG00000236439.4	chr1	202471864	202472117	-	-1.48	-13.7	1.51e-36	7.16e-36	Down-regulated genes	lncRNA
RP11-195E2.1	ENSG00000230847.4	chr5	71074225	71093193	-	-1.04	-12.32	1.07e-30	4.3e-30	Down-regulated genes	lncRNA
RP11-231C14.6	ENSG00000260413.1	chr16	29312350	29331277	+	-1.74	-47.39	4.17e-188	8.41e-186	Down-regulated genes	lncRNA
RP11-242D8.3	ENSG00000267340.1	chr17	43169880	43170077	-	-1.29	-14.14	1.66e-38	8.33e-38	Down-regulated genes	lncRNA
RP11-288H12.3	ENSG00000213073.4	chr6	160093082	160096212	+	-1.6	-34.98	4.55e-137	2.5e-135	Down-regulated genes	lncRNA
RP11-33B1.1	ENSG00000245958.6	chr4	119454791	119552025	+	-1.46	-17.21	1.44e-52	1.01e-51	Down-regulated genes	lncRNA
RP11-345J4.5	ENSG00000261740.5	chr16	29443056	29454651	-	1.96	24.87	9.58e-90	1.61e-88	Up-regulated genes	protein_coding
RP11-345P4.6	ENSG00000269227.1	chr1	1673275	1674397	+	-1.37	-27.57	8.64e-103	1.99e-101	Down-regulated genes	lncRNA
RP11-419C5.2	ENSG00000226232.8	chr16	69976388	69996188	-	-2.12	-24.7	5.94e-89	9.83e-88	Down-regulated genes	lncRNA
RP11-44F14.6	ENSG00000279722.1	chr16	53487607	53489943	-	-1.15	-29.26	7.6e-111	2.13e-109	Down-regulated genes	others
RP11-465B22.3	ENSG00000217801.9	chr1	1059734	1069355	+	1.67	14.95	4.27e-42	2.35e-41	Up-regulated genes	lncRNA
RP11-497H16.5	ENSG00000196302.5	chr5	70516387	70555266	-	-1.38	-12.94	2.66e-33	1.15e-32	Down-regulated genes	lncRNA
RP11-504P24.3	ENSG00000185495.10	chr1	223992743	224010612	+	-1.04	-10.55	1.18e-23	3.92e-23	Down-regulated genes	lncRNA
RP11-578O24.2	ENSG00000254352.1	chr8	78723796	78724136	-	-1.38	-36.54	6.26e-144	4.08e-142	Down-regulated genes	lncRNA
RP11-677M14.5	ENSG00000254941.1	chr11	124807822	124808269	-	-1.02	-14.6	1.61e-40	8.48e-40	Down-regulated genes	lncRNA
RP11-6L6.4	ENSG00000279845.1	chr4	146180851	146181316	+	-1.35	-29.76	3.46e-113	1.03e-111	Down-regulated genes	others
RP11-927P21.5	ENSG00000263647.1	chr17	64761912	64762710	-	-2.2	-20.67	3.05e-69	3.16e-68	Down-regulated genes	lncRNA
RP11-958N24.2	ENSG00000227827.3	chr16	16356224	16377507	+	-1.17	-11.91	5.38e-29	2.08e-28	Down-regulated genes	lncRNA
RP13-585F24.1	ENSG00000241612.1	chr4	19813749	19814231	+	1.05	11.27	1.96e-26	7.03e-26	Up-regulated genes	lncRNA
RP13-608F4.5	ENSG00000278603.1	chr15	82472203	82472426	+	2.28	17	1.44e-51	9.84e-51	Up-regulated genes	lncRNA
RP3-465N24.5	ENSG00000261349.1	chr1	25266102	25267136	-	-1.03	-12.51	1.84e-31	7.58e-31	Down-regulated genes	lncRNA
RPA3	ENSG00000106399.11	chr7	7636518	7718607	-	1.16	13.84	3.63e-37	1.75e-36	Up-regulated genes	protein_coding
RPH3AL	ENSG00000181031.15	chr17	212389	386254	-	-1.27	-9.7	1.57e-20	4.77e-20	Down-regulated genes	protein_coding
RPL23P2	ENSG00000176054.6	chr21	28997613	28998033	-	-1.41	-22.66	5.5e-79	7.25e-78	Down-regulated genes	lncRNA
RPL7	ENSG00000147604.13	chr8	73290267	73295789	-	-1.32	-14.63	1.18e-40	6.22e-40	Down-regulated genes	protein_coding
RPL9	ENSG00000163682.15	chr4	39454124	39458948	-	-1.17	-11.38	7.02e-27	2.55e-26	Down-regulated genes	protein_coding
S100PBP	ENSG00000116497.17	chr1	32816767	32858879	+	-1.11	-13.49	1.24e-35	5.73e-35	Down-regulated genes	protein_coding
SCAND2P	ENSG00000176700.19	chr15	84631451	84647478	+	-1.26	-15.8	5.59e-46	3.37e-45	Down-regulated genes	lncRNA
SCG5	ENSG00000166922.8	chr15	32641676	32697098	+	1.54	9.04	3.33e-18	9.33e-18	Up-regulated genes	protein_coding
SCGB1D1	ENSG00000168515.3	chr11	62190216	62193539	+	1.66	8.48	2.48e-16	6.51e-16	Up-regulated genes	protein_coding
SEC14L6	ENSG00000214491.8	chr22	30522799	30546682	-	-1.15	-16.89	4.35e-51	2.93e-50	Down-regulated genes	protein_coding
SENP7	ENSG00000138468.15	chr3	101324205	101513241	-	-2.48	-32.11	4.21e-124	1.62e-122	Down-regulated genes	protein_coding
SEPSECS-AS1	ENSG00000281501.1	chr4	25160641	25201440	+	1.33	12.49	2.21e-31	9.09e-31	Up-regulated genes	lncRNA
2025-09-07	ENSG00000122545.17	chr7	35800932	35907105	+	-1.05	-15.83	4.12e-46	2.49e-45	Down-regulated genes	protein_coding
SERINC2	ENSG00000168528.11	chr1	31409565	31434680	+	5	35.64	5.02e-140	2.94e-138	Up-regulated genes	protein_coding
SERPINE1	ENSG00000106366.8	chr7	101127089	101139266	+	-1.52	-7.32	9.65e-13	2.23e-12	Down-regulated genes	protein_coding
SF3B4	ENSG00000143368.9	chr1	149923317	149928344	-	1.33	17.1	4.52e-52	3.13e-51	Up-regulated genes	protein_coding
SFMBT1	ENSG00000163935.13	chr3	52903572	53046750	-	1.24	15.22	2.38e-43	1.35e-42	Up-regulated genes	protein_coding
SFMBT2	ENSG00000198879.11	chr10	7158624	7411486	-	-2.11	-31.55	1.5e-121	5.47e-120	Down-regulated genes	protein_coding
SFTPD	ENSG00000133661.15	chr10	79937740	79982614	-	1.12	8.83	1.72e-17	4.7e-17	Up-regulated genes	protein_coding
SGCA	ENSG00000108823.15	chr17	50164214	50175931	+	-1.74	-21.88	3.77e-75	4.51e-74	Down-regulated genes	protein_coding
SGCD	ENSG00000170624.13	chr5	155870344	156767788	+	-1.4	-14.64	1.01e-40	5.38e-40	Down-regulated genes	protein_coding
SIGLEC16	ENSG00000161643.12	chr19	49969673	49975814	+	-4.18	-52.5	8.93e-207	3.24e-204	Down-regulated genes	lncRNA
SLC12A5	ENSG00000124140.12	chr20	46021690	46060152	+	2.78	17.93	5.02e-56	3.84e-55	Up-regulated genes	protein_coding
SLC25A34	ENSG00000162461.7	chr1	15736405	15741396	+	-1.62	-21.88	3.91e-75	4.67e-74	Down-regulated genes	protein_coding
SLC35F2	ENSG00000110660.14	chr11	107790991	107928293	-	1.71	17.77	3.11e-55	2.33e-54	Up-regulated genes	protein_coding
SLC39A13	ENSG00000165915.13	chr11	47407132	47416501	+	-1.03	-12.95	2.58e-33	1.12e-32	Down-regulated genes	protein_coding
SLC6A1	ENSG00000157103.10	chr3	10992724	11039247	+	-1.34	-28.23	5.79e-106	1.44e-104	Down-regulated genes	protein_coding
SLFN5	ENSG00000166750.9	chr17	35243036	35273655	+	1.12	11.54	1.73e-27	6.42e-27	Up-regulated genes	protein_coding
SLX1B	ENSG00000181625.17	chr16	29454501	29458219	+	2.05	13.12	4.73e-34	2.1e-33	Up-regulated genes	protein_coding
SMEK1	ENSG00000100796.17	chr14	91457611	91510554	-	-1.19	-15.23	2.11e-43	1.2e-42	Down-regulated genes	protein_coding
SMG1P7	ENSG00000261556.8	chr16	70219574	70245616	-	-2.44	-36.76	6.38e-145	4.26e-143	Down-regulated genes	lncRNA
SNAI2	ENSG00000019549.8	chr8	48917690	48921740	-	-1.77	-12.34	9.12e-31	3.7e-30	Down-regulated genes	protein_coding
SNHG5	ENSG00000203875.10	chr6	85660950	85678736	-	-1.32	-9.7	1.68e-20	5.1e-20	Down-regulated genes	lncRNA
SNHG8	ENSG00000269893.6	chr4	118278709	118279823	+	-1.38	-11.56	1.41e-27	5.22e-27	Down-regulated genes	lncRNA
SNRPG	ENSG00000143977.13	chr2	70281362	70293771	-	1.07	12.32	1.16e-30	4.68e-30	Up-regulated genes	protein_coding
SORD2P	ENSG00000259479.6	chr15	44826371	44884694	-	1.94	17.59	2.28e-54	1.67e-53	Up-regulated genes	lncRNA
SPATA20	ENSG00000006282.19	chr17	50543058	50555852	+	-1.85	-20.12	1.46e-66	1.42e-65	Down-regulated genes	protein_coding
SPC25	ENSG00000152253.8	chr2	168834132	168913371	-	2.67	26.53	8.36e-98	1.7e-96	Up-regulated genes	protein_coding
SPR	ENSG00000116096.5	chr2	72887360	72892158	+	1.03	11.09	9.55e-26	3.36e-25	Up-regulated genes	protein_coding
SRRT	ENSG00000087087.18	chr7	100875111	100888664	+	-1.17	-16.73	2.5e-50	1.66e-49	Down-regulated genes	protein_coding
SSBP3-AS1	ENSG00000198711.5	chr1	54236440	54239063	+	-1.24	-24.06	8.57e-86	1.32e-84	Down-regulated genes	lncRNA
ST6GALNAC6	ENSG00000160408.14	chr9	127885321	127905408	-	-2.19	-22.72	2.84e-79	3.78e-78	Down-regulated genes	protein_coding
STAG3L1	ENSG00000205583.13	chr7	75359194	75395383	+	-1.49	-15.78	6.94e-46	4.17e-45	Down-regulated genes	lncRNA
STAG3L5P	ENSG00000242294.6	chr7	100336079	100351900	+	-2.45	-23.69	5.22e-84	7.73e-83	Down-regulated genes	lncRNA
STAG3L5P-PVRIG2P-PILRB	ENSG00000272752.5	chr7	100336104	100367831	+	-2.47	-24.63	1.39e-88	2.28e-87	Down-regulated genes	protein_coding
STAMBPL1	ENSG00000138134.11	chr10	88879734	88975153	+	-2.52	-37.16	1.23e-146	8.73e-145	Down-regulated genes	protein_coding
STOX1	ENSG00000165730.14	chr10	68827541	68895432	+	1.29	13.66	2.14e-36	1.01e-35	Up-regulated genes	protein_coding
STYXL1	ENSG00000127952.16	chr7	75996338	76048004	-	1.09	14.45	7.22e-40	3.75e-39	Up-regulated genes	protein_coding
SUZ12P1	ENSG00000264538.6	chr17	30709299	30790908	+	-1.52	-20.21	5e-67	4.92e-66	Down-regulated genes	lncRNA
TAF13	ENSG00000197780.9	chr1	109062486	109076002	-	1.14	14.24	6.3e-39	3.19e-38	Up-regulated genes	protein_coding
TAGLN	ENSG00000149591.16	chr11	117199321	117204782	+	-2.55	-13.72	1.22e-36	5.79e-36	Down-regulated genes	protein_coding
TAPBPL	ENSG00000139192.11	chr12	6451690	6466517	+	1.22	10.82	1.13e-24	3.87e-24	Up-regulated genes	protein_coding
TAS2R20	ENSG00000255837.1	chr12	10996495	10997875	-	-1.43	-39.87	3.75e-158	3.52e-156	Down-regulated genes	protein_coding
TATDN2	ENSG00000157014.10	chr3	10248023	10281218	+	-1.14	-15.72	1.32e-45	7.85e-45	Down-regulated genes	protein_coding
TDGF1	ENSG00000241186.7	chr3	46574555	46626543	+	-2.51	-24.11	4.63e-86	7.17e-85	Down-regulated genes	protein_coding
TDRKH	ENSG00000182134.15	chr1	151770107	151791416	-	1.76	20.08	2.36e-66	2.28e-65	Up-regulated genes	protein_coding
TEPP	ENSG00000159648.11	chr16	57976435	57988116	+	-1.02	-15.52	1.03e-44	6.05e-44	Down-regulated genes	protein_coding
TFAP2C	ENSG00000087510.6	chr20	56629302	56639283	+	3.26	23.1	4.21e-81	5.82e-80	Up-regulated genes	protein_coding
TFG	ENSG00000114354.12	chr3	100709331	100748966	+	1.14	14.98	3.16e-42	1.74e-41	Up-regulated genes	protein_coding
THUMPD1	ENSG00000066654.12	chr16	20733664	20742084	-	-1.36	-16.69	3.93e-50	2.6e-49	Down-regulated genes	protein_coding
TMBIM4	ENSG00000282031.1	chr12	66135846	66170072	-	1.72	15.55	8.04e-45	4.72e-44	Up-regulated genes	protein_coding
TMEM119	ENSG00000183160.8	chr12	108589846	108598320	-	1.46	9.71	1.46e-20	4.44e-20	Up-regulated genes	protein_coding
TMEM189	ENSG00000240849.10	chr20	50118254	50153734	-	1.16	14.4	1.21e-39	6.26e-39	Up-regulated genes	protein_coding
TMEM190	ENSG00000160472.4	chr19	55376836	55378244	+	1.07	6.68	6.38e-11	1.36e-10	Up-regulated genes	protein_coding
TMEM220	ENSG00000187824.8	chr17	10699015	10730316	-	-1.46	-20.11	1.6e-66	1.55e-65	Down-regulated genes	protein_coding
TMEM223	ENSG00000168569.7	chr11	62771629	62792021	-	1.29	18.89	1.32e-60	1.12e-59	Up-regulated genes	protein_coding
TMEM61	ENSG00000143001.4	chr1	54980792	54992293	+	1.63	15.71	1.48e-45	8.81e-45	Up-regulated genes	protein_coding
TNXA	ENSG00000248290.1	chr6	32008614	32012472	-	-1.11	-17.3	5.04e-53	3.57e-52	Down-regulated genes	lncRNA
TPCN2	ENSG00000162341.15	chr11	69048897	69090604	+	-1.8	-24.05	9.31e-86	1.43e-84	Down-regulated genes	protein_coding
TPM2	ENSG00000198467.13	chr9	35681992	35691020	-	-2.25	-17.69	7.54e-55	5.58e-54	Down-regulated genes	protein_coding
TPM3P9	ENSG00000241015.2	chr19	53431984	53444670	+	-1.61	-21.15	1.42e-71	1.55e-70	Down-regulated genes	lncRNA
TRIM66	ENSG00000166436.15	chr11	8612037	8671866	-	-1.05	-15.11	7.83e-43	4.38e-42	Down-regulated genes	protein_coding
TRPV4	ENSG00000111199.10	chr12	109783085	109833401	-	1.29	13.27	1.04e-34	4.71e-34	Up-regulated genes	protein_coding
TSFM	ENSG00000123297.16	chr12	57782589	57808071	+	1.02	13.73	1.11e-36	5.3e-36	Up-regulated genes	protein_coding
TTC32	ENSG00000183891.5	chr2	19896643	19901986	-	-1.4	-15.95	1.15e-46	7.05e-46	Down-regulated genes	protein_coding
TUB	ENSG00000166402.8	chr11	8019244	8106112	+	-2.75	-29.66	1.04e-112	3.06e-111	Down-regulated genes	protein_coding
TUBG2	ENSG00000037042.8	chr17	42659305	42667006	+	-2.32	-29.37	2.29e-111	6.51e-110	Down-regulated genes	protein_coding
UBE2QL1	ENSG00000215218.3	chr5	6448623	6494909	+	-1.08	-14.88	8.92e-42	4.86e-41	Down-regulated genes	protein_coding
UBQLNL	ENSG00000175518.6	chr11	5514393	5516705	-	-1.2	-25.52	6.7e-93	1.22e-91	Down-regulated genes	protein_coding
UCA1	ENSG00000214049.6	chr19	15828961	15836320	+	3.24	13.85	3.28e-37	1.59e-36	Up-regulated genes	lncRNA
UFSP1	ENSG00000176125.4	chr7	100888723	100889718	-	1.29	18.3	8.54e-58	6.78e-57	Up-regulated genes	protein_coding
UGT2B7	ENSG00000171234.13	chr4	69051363	69112987	+	3.47	19.22	3.4e-62	2.98e-61	Up-regulated genes	protein_coding
UPK3B	ENSG00000243566.6	chr7	76510428	76516521	+	4.26	17.86	1.18e-55	8.91e-55	Up-regulated genes	protein_coding
USP6	ENSG00000129204.16	chr17	5116438	5175034	+	-1.33	-25.33	5.35e-92	9.56e-91	Down-regulated genes	protein_coding
UVSSA	ENSG00000163945.15	chr4	1347266	1388049	+	-2.1	-23.98	2.06e-85	3.14e-84	Down-regulated genes	protein_coding
VANGL1	ENSG00000173218.14	chr1	115641953	115698224	+	2.12	20.44	4.15e-68	4.19e-67	Up-regulated genes	protein_coding
VAV1	ENSG00000141968.7	chr19	6772714	6857366	+	1.5	13.06	8.24e-34	3.63e-33	Up-regulated genes	protein_coding
VAX2	ENSG00000116035.2	chr2	70900590	70933446	+	1.2	9.82	6.23e-21	1.91e-20	Up-regulated genes	protein_coding
VCAM1	ENSG00000162692.10	chr1	100719742	100739045	+	-1.72	-10.81	1.23e-24	4.2e-24	Down-regulated genes	protein_coding
VIPR2	ENSG00000106018.13	chr7	159028175	159144957	-	-2.89	-38.05	1.75e-150	1.36e-148	Down-regulated genes	protein_coding
VPS13C	ENSG00000129003.15	chr15	61852389	62060473	-	-2.13	-27.98	8.97e-105	2.17e-103	Down-regulated genes	protein_coding
WASH2P	ENSG00000146556.14	chr2	113588550	113599043	+	-1.76	-23.06	6.5e-81	8.95e-80	Down-regulated genes	lncRNA
WBSCR27	ENSG00000165171.10	chr7	73834590	73842535	-	1.13	8.12	3.49e-15	8.83e-15	Up-regulated genes	protein_coding
WDR86	ENSG00000187260.15	chr7	151375909	151410727	-	-1	-6.82	2.56e-11	5.57e-11	Down-regulated genes	protein_coding
WDR91	ENSG00000105875.13	chr7	135183839	135211534	-	-1.15	-12.31	1.18e-30	4.75e-30	Down-regulated genes	protein_coding
XCL2	ENSG00000143185.3	chr1	168540765	168543997	-	1.05	10.37	5.52e-23	1.8e-22	Up-regulated genes	protein_coding
XXbac-BPG283O16.9	ENSG00000280128.1	chr6	30282349	30286054	-	-1.21	-13.01	1.34e-33	5.86e-33	Down-regulated genes	others
ZBTB45P2	ENSG00000226065.1	chr2	110383112	110384642	+	1.04	11.31	1.38e-26	4.97e-26	Up-regulated genes	lncRNA
ZEB1	ENSG00000148516.21	chr10	31318495	31529814	+	-1.82	-20.58	8.46e-69	8.65e-68	Down-regulated genes	protein_coding
ZFYVE16	ENSG00000039319.16	chr5	80408013	80479350	+	-1.93	-27.67	2.75e-103	6.44e-102	Down-regulated genes	protein_coding
ZFYVE28	ENSG00000159733.13	chr4	2269582	2418663	-	-1.23	-14.72	4.37e-41	2.34e-40	Down-regulated genes	protein_coding
ZNF117	ENSG00000152926.14	chr7	64971776	65006684	-	-1.17	-11.73	2.93e-28	1.11e-27	Down-regulated genes	protein_coding
ZNF177	ENSG00000188629.11	chr19	9363020	9382617	+	-1.51	-18.83	2.55e-60	2.15e-59	Down-regulated genes	protein_coding
ZNF232	ENSG00000167840.13	chr17	5105541	5123116	-	-1.02	-12.09	1.02e-29	4.02e-29	Down-regulated genes	protein_coding
ZNF266	ENSG00000174652.17	chr19	9412598	9435578	-	-1.76	-17.68	8.18e-55	6.05e-54	Down-regulated genes	protein_coding
ZNF451	ENSG00000112200.16	chr6	57086844	57170307	+	-1.28	-16.98	1.75e-51	1.2e-50	Down-regulated genes	protein_coding
ZNF589	ENSG00000164048.13	chr3	48241100	48299253	+	-1.37	-15.46	1.93e-44	1.12e-43	Down-regulated genes	protein_coding
ZNF662	ENSG00000182983.14	chr3	42905731	42917641	+	-2.33	-30.59	4.56e-117	1.5e-115	Down-regulated genes	protein_coding
ZNF76	ENSG00000065029.14	chr6	35258909	35295985	+	-1.91	-21.18	9.43e-72	1.04e-70	Down-regulated genes	protein_coding
ZNHIT1	ENSG00000106400.11	chr7	101217668	101224190	+	1.63	23.22	1.07e-81	1.51e-80	Up-regulated genes	protein_coding
ZSCAN26	ENSG00000197062.11	chr6	28267010	28278224	+	-1.2	-14.97	3.28e-42	1.8e-41	Down-regulated genes	protein_coding
ZSWIM7	ENSG00000214941.7	chr17	15976560	15999717	-	-1.29	-17.29	6.17e-53	4.35e-52	Down-regulated genes	protein_coding
ZSWIM8	ENSG00000214655.10	chr10	73785582	73801797	+	-2.11	-24.34	3.51e-87	5.6e-86	Down-regulated genes	protein_coding

## Sheet: Table S8
Table S8. Candidate susceptibility genes reported in breast cancer studies
Chromosome	Gene	Reference
chr1	CCDC23	Qiao S, Hou Y, Rong Q, Han B, Liu P. Tregs are involved in VEGFA/VASH1-related angiogenesis pathway in ovarian cancer. Translational Oncology. 2023;32:101665.
chr1	FAM183A	Chivukula IV, Ramsköld D, Storvall H, Anderberg C, Jin S, Mamaeva V, et al. Decoding breast cancer tissue–stroma interactions using species-specific sequencing. Breast Cancer Research. 2015;17:1-14.
chr1	IQCG	Bjørklund SS, Panda A, Kumar S, Seiler M, Robinson D, Gheeya J, et al. Widespread alternative exon usage in clinically distinct subtypes of invasive ductal carcinoma. Scientific reports. 2017;7(1):5568.
chr3	SCN11A	Peng W, Shi X, Zhang Y, Zhao H, Zhang Y, Han J, et al. Transcriptional expressions of SCNs family correlates with overall survival in patients with breast cancer. 2021.
chr6	HIST1H2BB	Singh R, Bassett E, Chakravarti A, Parthun MR. Replication-dependent histone isoforms: a new source of complexity in chromatin structure and function. Nucleic acids research. 2018;46(17):8665-78.
chr15	RCCD1	Kar SP, Beesley J, Amin Al Olama A, Michailidou K, Tyrer J, Kote-Jarai Z, et al. Genome-wide meta-analyses of breast, ovarian, and prostate cancer association studies identify multiple new susceptibility loci shared by at least two cancer types. Cancer discovery. 2016;6(9):1052-67.
chr16	ERVK13-1	Záveskýa L, Minářd EJVWL, Slanařb MKO. Human Endogenous Retroviruses in Breast Cancer: Altered Expression Pattern Implicates Divergent Roles in Carcinogenesis. regulation. 2024;14:15.
chr16	FAHD1	Holzknecht M, Guerrero‐Navarro L, Petit M, Albertini E, Damisch E, Simonini A, et al. The mitochondrial enzyme FAHD1 regulates complex II activity in breast cancer cells and is indispensable for basal BT‐20 cells in vitro. FEBS letters. 2022;596(21):2781-94.
chr16	TPSAB1	Chen X, Ren C, Zhou Z, Chen J, Fan X, Li X, et al. Development of an ubiquitin‐proteasome system signature for predicting prognosis and providing therapeutic guidance for patients with triple‐negative breast cancer. The Journal of Gene Medicine. 2024;26(1):e3584.
chr17	KANSL1	Yang Y, Chen Y, Xu S, Guo X, Jia G, Ping J, et al. Integrating genome and epigenome data to identify tissue-specific DNA methylation biomarkers for cancer risk. medRxiv. 2023:2023.08. 09.23293899.
chr17	EFCAB13	Määttä K, Rantapero T, Lindström A, Nykter M, Kankuri-Tammilehto M, Laasanen S-L, et al. Whole-exome sequencing of Finnish hereditary breast cancer families. European Journal of Human Genetics. 2017;25(1):85-93.
chr17	TBC1D3	Wang B, Zhao H, Zhao L, Zhang Y, Wan Q, Shen Y, et al. Up-regulation of OLR1 expression by TBC1D3 through activation of TNFα/NF-κB pathway promotes the migration of human breast cancer cells. Cancer letters. 2017;408:60-70.
chr17	AOC2	Smith-Byrne K, Hedman A, Dimitriou M, Desai T, Sokolov AV, Schioth HB, et al. Identifying therapeutic targets for cancer: 2,094 circulating proteins and risk of nine cancers. medRxiv. 2023:2023.05. 05.23289547.
chr17	CCL4	Sasaki S, Baba T, Nishimura T, Hayakawa Y, Hashimoto S-i, Gotoh N, et al. Essential roles of the interaction between cancer cell-derived chemokine, CCL4, and intra-bone CCR5-expressing fibroblasts in breast cancer bone metastasis. Cancer letters. 2016;378(1):23-32.
chr17	HOXB4	Zhou G, Liu X, Xiong B, Sun Y. Homeobox B4 inhibits breast cancer cell migration by directly binding to StAR‑related lipid transfer domain protein 13. Oncology letters. 2017;14(4):4625-32
chr17	MAPT	Zhang N, Li Y, Sundquist J, Sundquist K, Ji J. Identifying actionable druggable targets for breast cancer: Mendelian randomization and population-based analyses. EBioMedicine. 2023;98.
chr19	LGALS7	Jones C, Mackay A, Grigoriadis A, Cossu A, Reis-Filho JS, Fulford L, et al. Expression profiling of purified normal human luminal and myoepithelial breast cells: identification of novel prognostic markers for breast cancer. Cancer research. 2004;64(9):3037-45.

## Sheet: Table S9
Table S9. Colocalization of HGSOC GWAS leading SNPs with PCG-eQTLs and lnc-eQTLs
Chr	GWAS SNP	Risk allele	P-value(GWAS)	Gene	Type	PP_H4 (coloc)
8	8:82653644_A/G (rs11782652)	G	5.64e-11	CHMP4C	PCG	1
17	17:43460374_A/G (rs62064595)	G	5.71e-10	ARL17B	PCG	0.98
17	17:44412076_A/G (rs369158541)	G	3.18e-10	LRRC37A	PCG	0.84
17	17:44412076_A/G (rs369158541)	G	3.18e-10	LRRC37A2	PCG	1
17	17:44781030_G/C (17:44781030)	C	6.14e-10	ARL17A	PCG	0.99
17	17:44495308_A/G (rs146761208)	G	6.9e-10	MAPT	PCG	0.87
2	2:177060877_T/C (rs4473418)	C	1.09e-09	HOXD-AS1	lncRNA	0.94
17	17:44495308_A/G (rs146761208)	G	6.9e-10	KANSL1-AS1	lncRNA	0.98
17	17:44495308_A/G (rs146761208)	G	6.9e-10	CRHR1-IT1	lncRNA	1
17	17:44495308_A/G (rs146761208)	G	6.9e-10	LOC102724391	lncRNA	0.97

[truncated: 6 more sheets: Table S10, Table S11, Table S12, Table S13, Table S14, Table S15]
